# Supplementary material for: One-pot synthesis of pyrrolo[1,2-a]quinoxalines
Source: Royal Society of Chemistry journal article supplement (doi:10.1039/c1ob05936j), 2011-01-01

## Supporting Information

### One-pot synthesis of pyrrolo[1,2-*a*]quinoxalines

Aiping Huang,<sup>a</sup> Feng Liu,<sup>a</sup> Chunjing Zhan,<sup>a</sup> Yanli Liu <sup>a</sup> and Chen Ma<sup>\*a,b</sup>

School of Chemistry and Chemical Engineering, Shandong University, Jinan, 250100, P R China, and State Key Laboratory of

Natural and Biomimetic Drugs, Peking University, Beijing, 100191, P R China

Single crystals of **5e** and **5g** suitable for X-ray crystal analysis were obtained by recrystallization from a hexane/CH<sub>2</sub>Cl<sub>2</sub> mixed solvent. The diffraction data was collected with a Bruker SMART CCD diffractometer using a graphite monochromated Mo K $\alpha$  radiation ( $\lambda$ = 0.71073 Å) at 298(2) or 293(2) K. The structure were solved by direct methods with SHELXS-97 program and refinements on F<sup>2</sup> were performed with SHELXL-97 program by full-matrix least-squares techniques with anisotropic thermal parameters for the non-hydrogen atoms.

**Table S1 Crystal structure determination of 5e and 5g**

| Compound                                                                      | <b>5e</b>                                         | <b>5g</b>                                        |
|-------------------------------------------------------------------------------|---------------------------------------------------|--------------------------------------------------|
| Chemical formula                                                              | C <sub>18</sub> H <sub>13</sub> FN <sub>2</sub> O | C <sub>19</sub> H <sub>16</sub> N <sub>2</sub> O |
| Formula Mass                                                                  | 292.30                                            | 288.34                                           |
| Crystal system                                                                | Monoclinic                                        | Triclinic                                        |
| <i>a</i> /Å                                                                   | 8.023                                             | 9.032(2)                                         |
| <i>b</i> /Å                                                                   | 15.891                                            | 9.319(2)                                         |
| <i>c</i> /Å                                                                   | 22.670                                            | 9.925(2)                                         |
| $\alpha$ /°                                                                   | 90.00                                             | 88.946(2)                                        |
| $\beta$ /°                                                                    | 97.96                                             | 73.298(2)                                        |
| $\gamma$ /°                                                                   | 90.00                                             | 65.822(2)                                        |
| Unit cell volume/Å <sup>3</sup>                                               | 2862.5                                            | 725.2(3)                                         |
| Temperature/K                                                                 | 298(2)                                            | 293(2)                                           |
| Space group                                                                   | <i>C</i> 2/ <i>c</i>                              | <i>P</i> -1                                      |
| No. of formula units per unit cell, <i>Z</i>                                  | 8                                                 | 2                                                |
| No. of reflections measured                                                   | 12000                                             | 6179                                             |
| No. of independent reflections                                                | 3301                                              | 3244                                             |
| <i>R</i> <sub>int</sub>                                                       | 0.0231                                            | 0.0201                                           |
| Final <i>R</i> <sub><i>I</i></sub> values ( <i>I</i> > 2σ( <i>I</i> ))        | 0.0495                                            | 0.0563                                           |
| Final <i>wR</i> ( <i>F</i> <sup>2</sup> ) values ( <i>I</i> > 2σ( <i>I</i> )) | 0.1248                                            | 0.1758                                           |
| Final <i>R</i> <sub><i>I</i></sub> values (all data)                          | 0.0772                                            | 0.0787                                           |
| Final <i>wR</i> ( <i>F</i> <sup>2</sup> ) values (all data)                   | 0.1443                                            | 0.2001                                           |

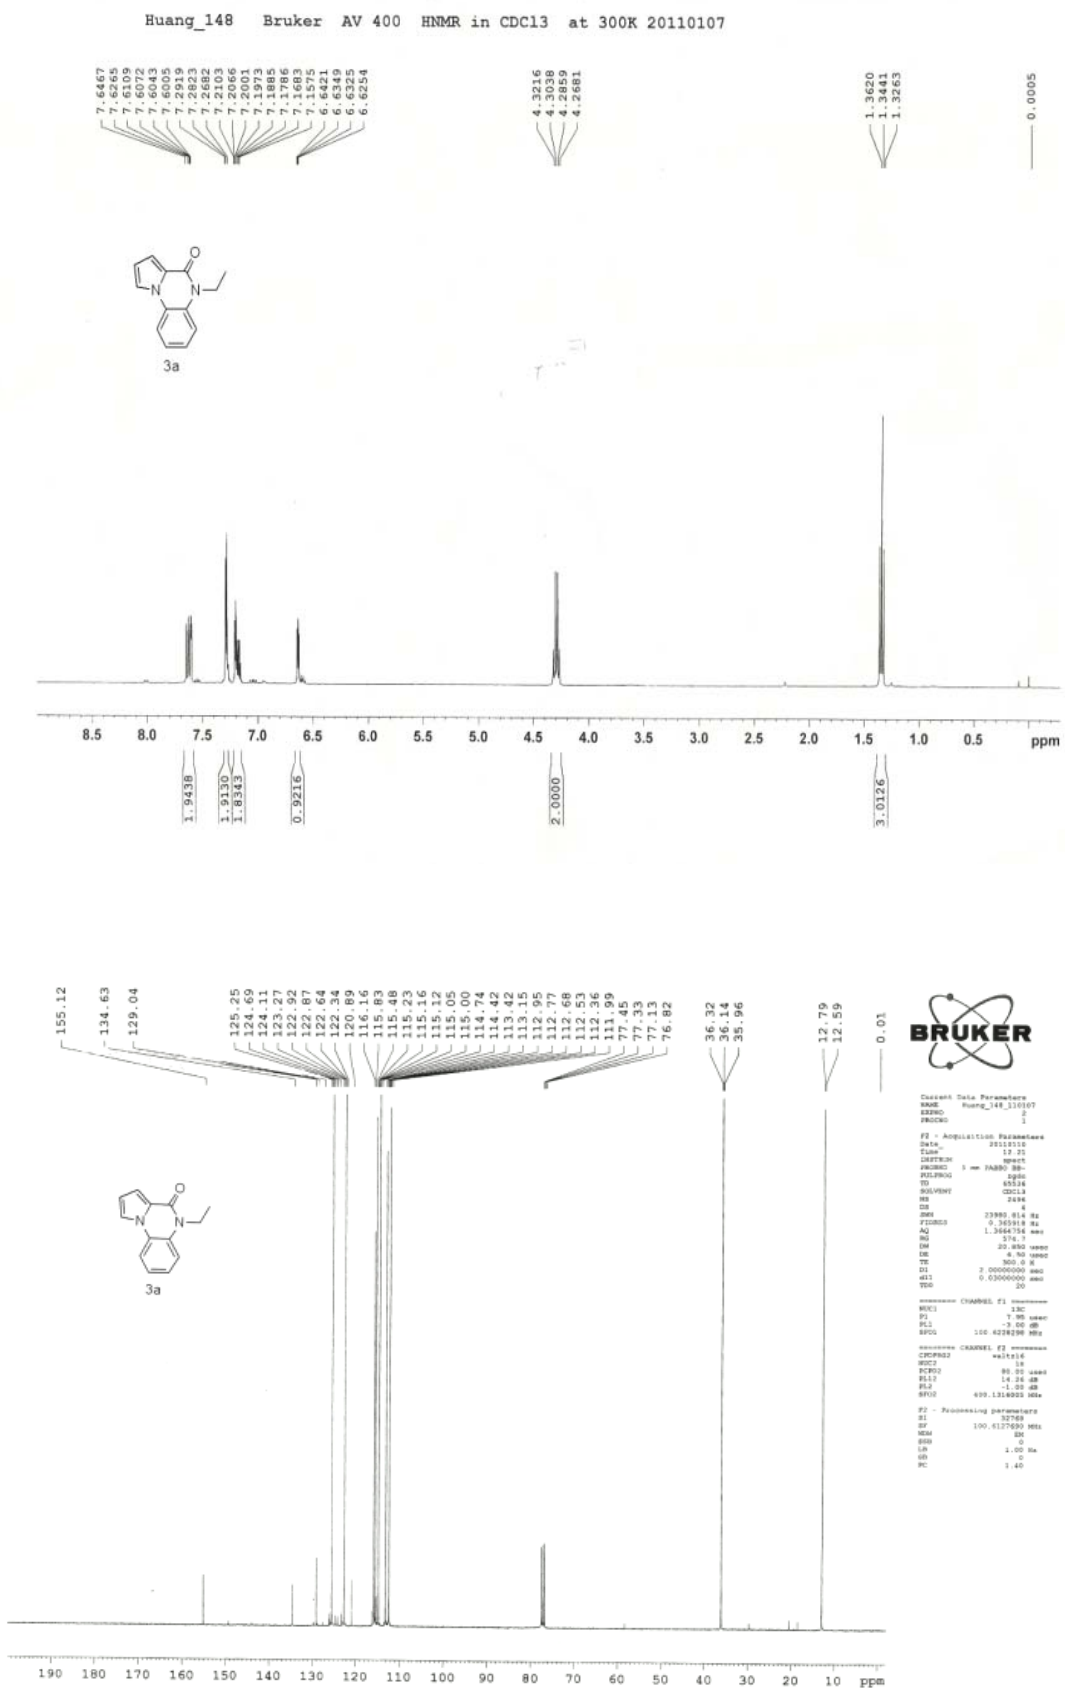

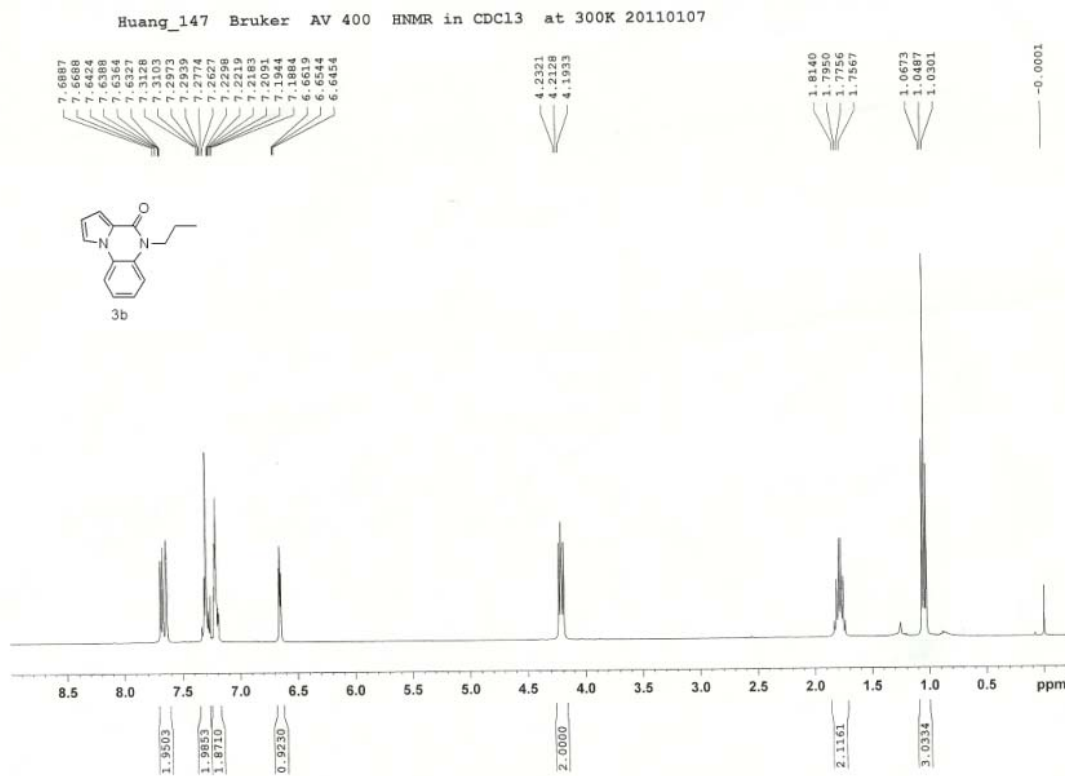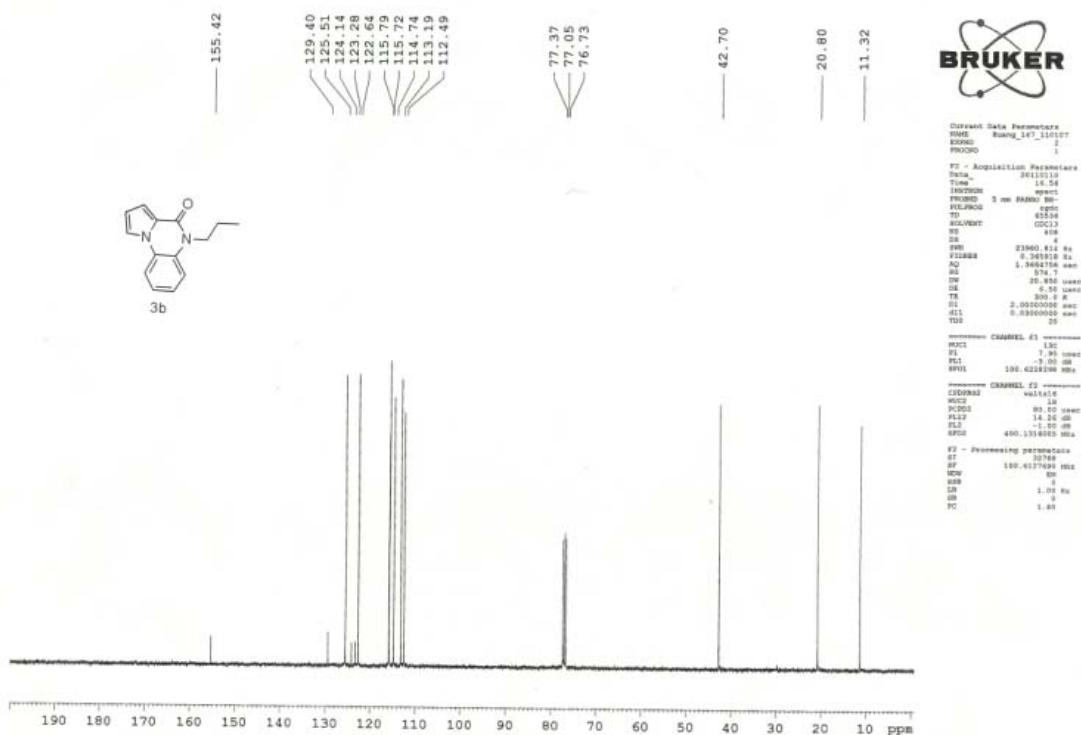

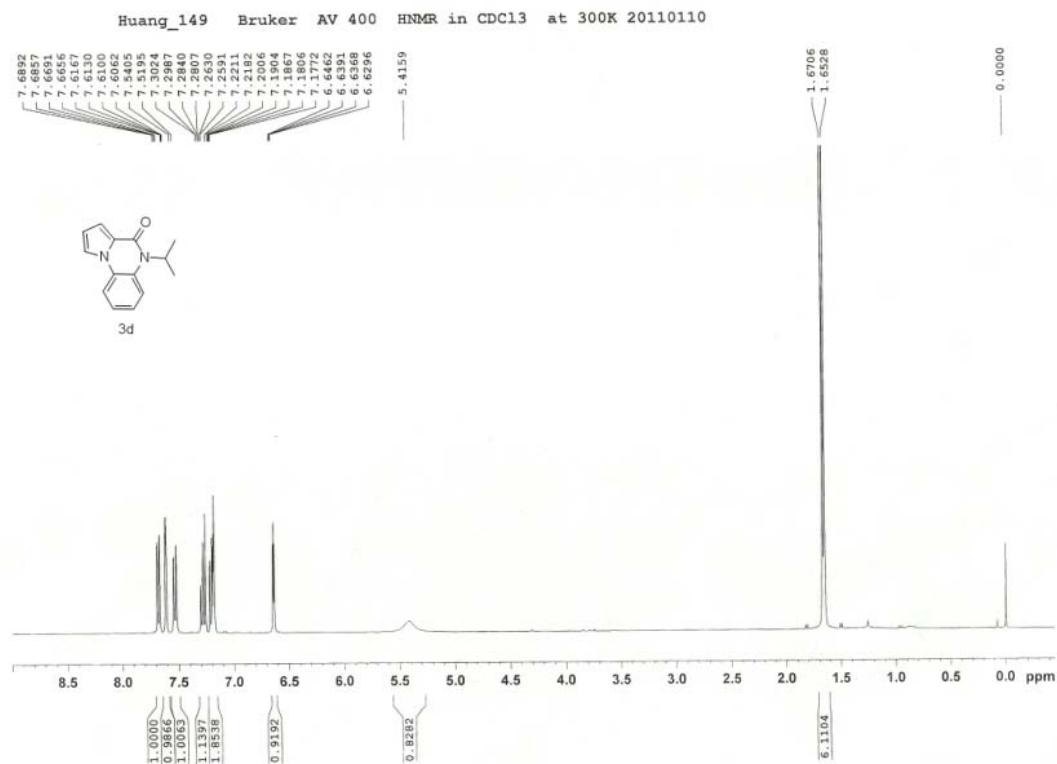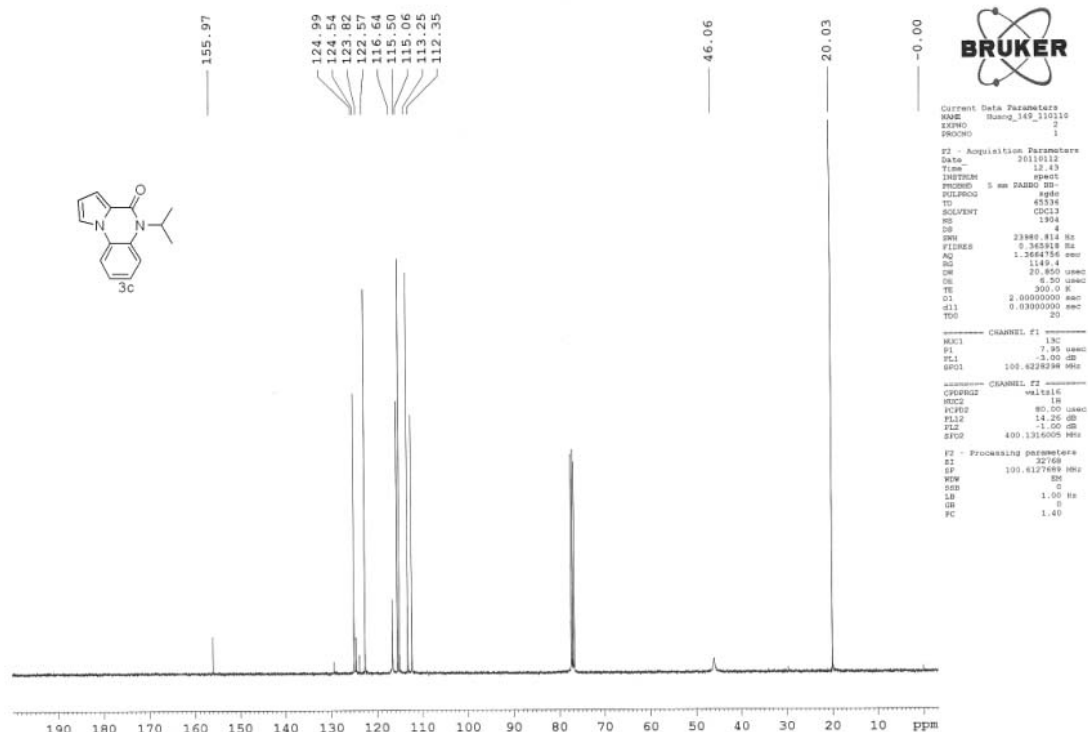

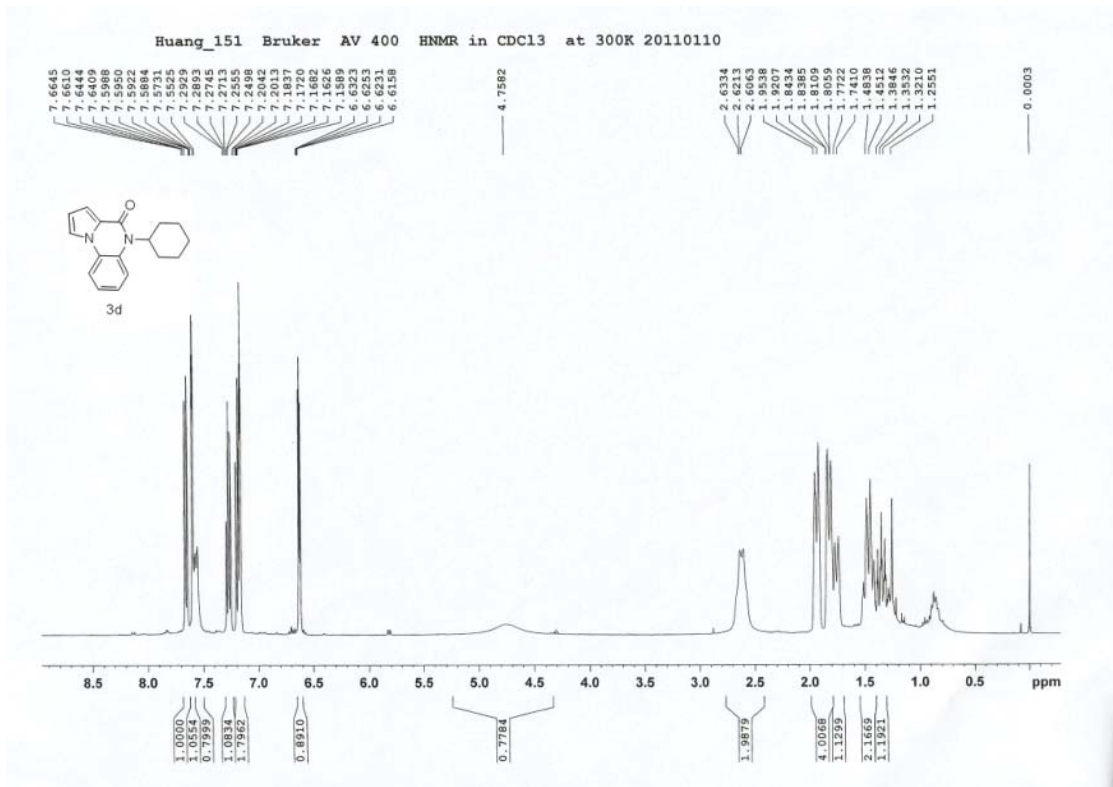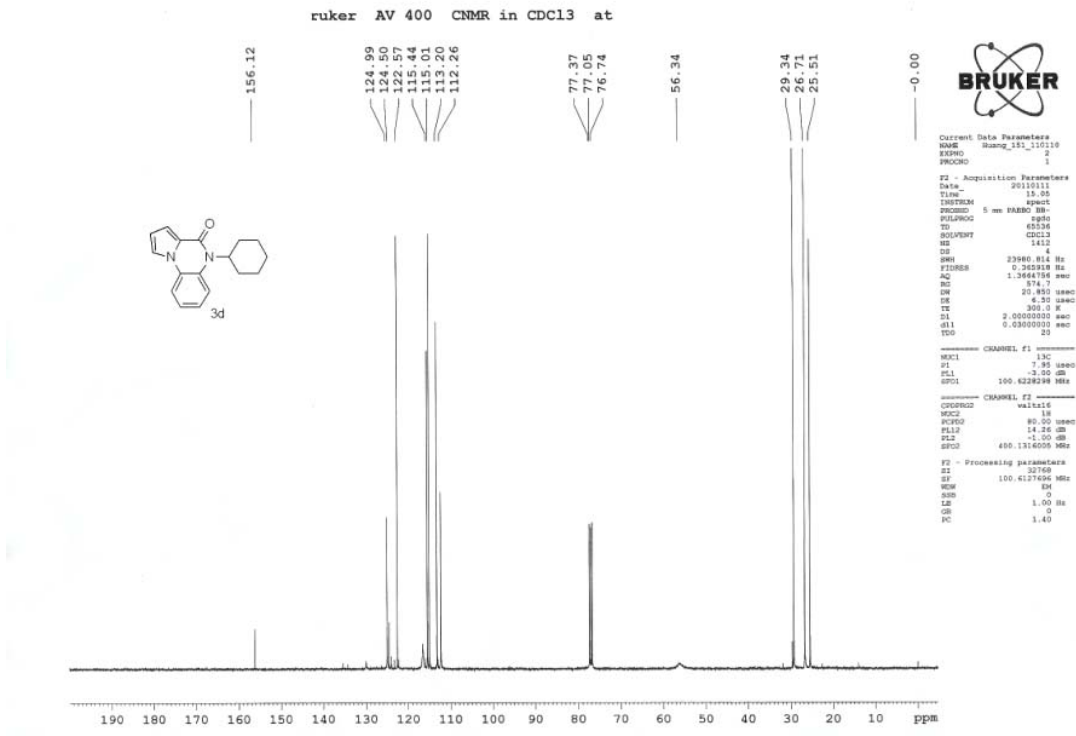

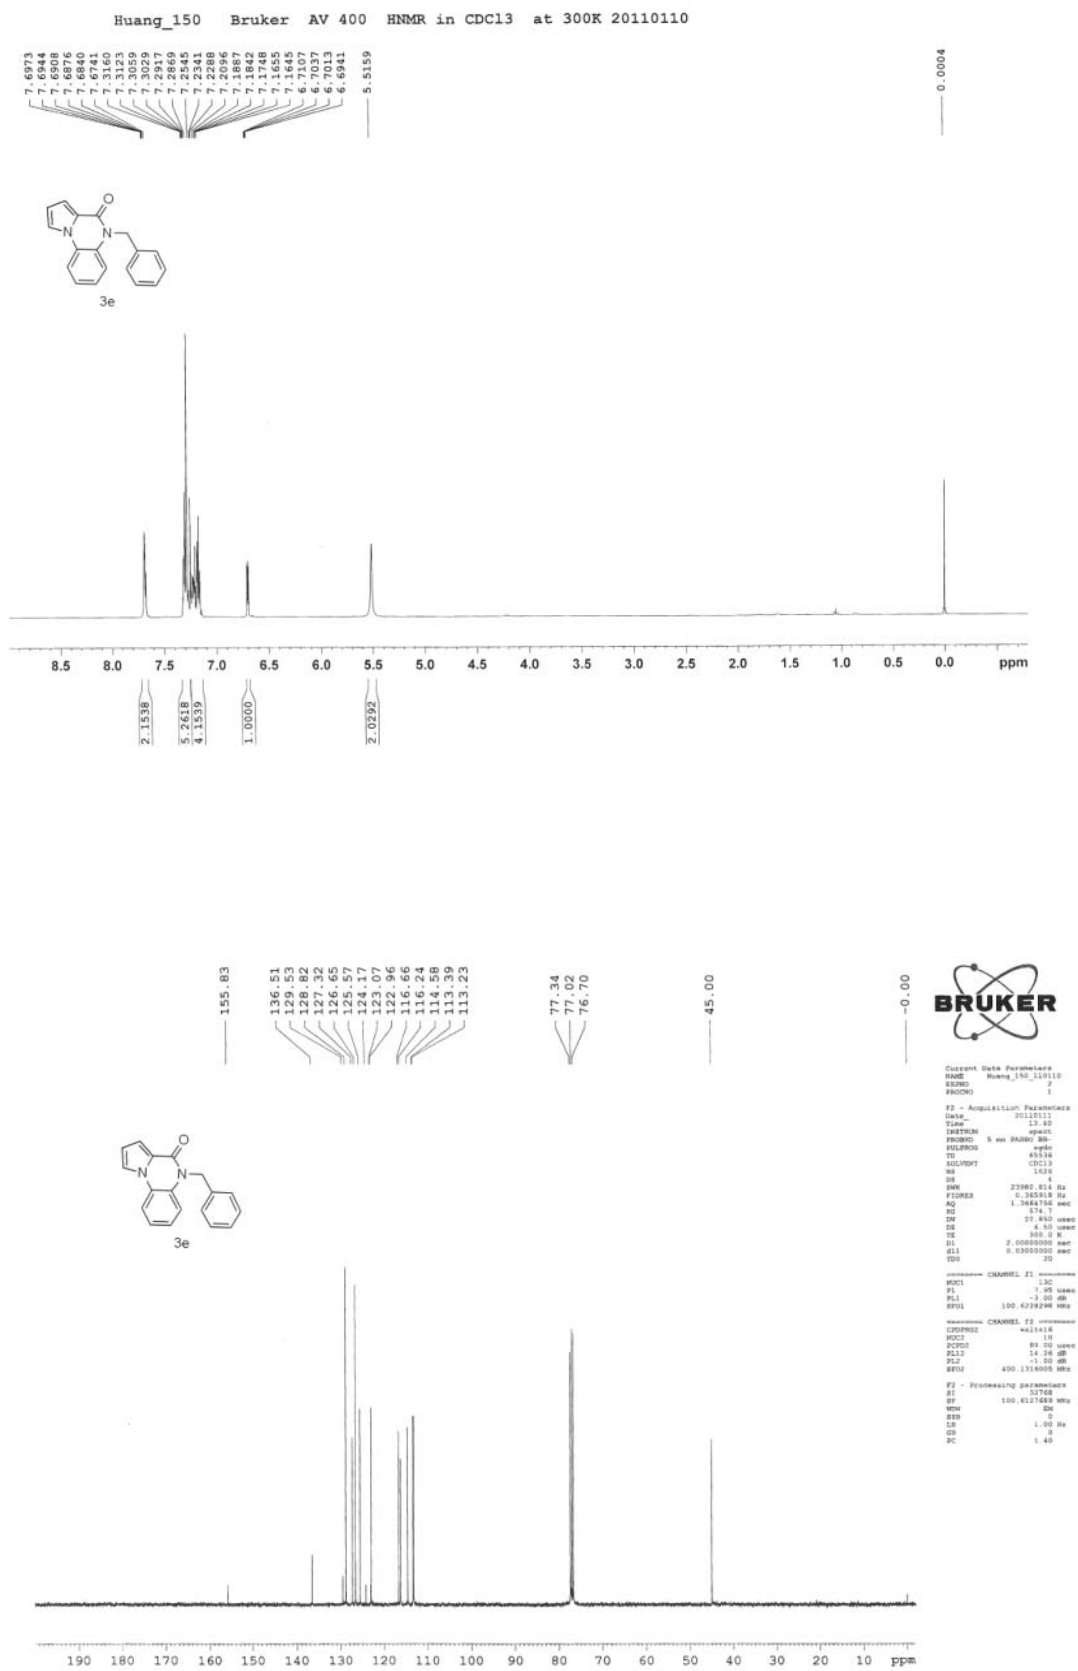

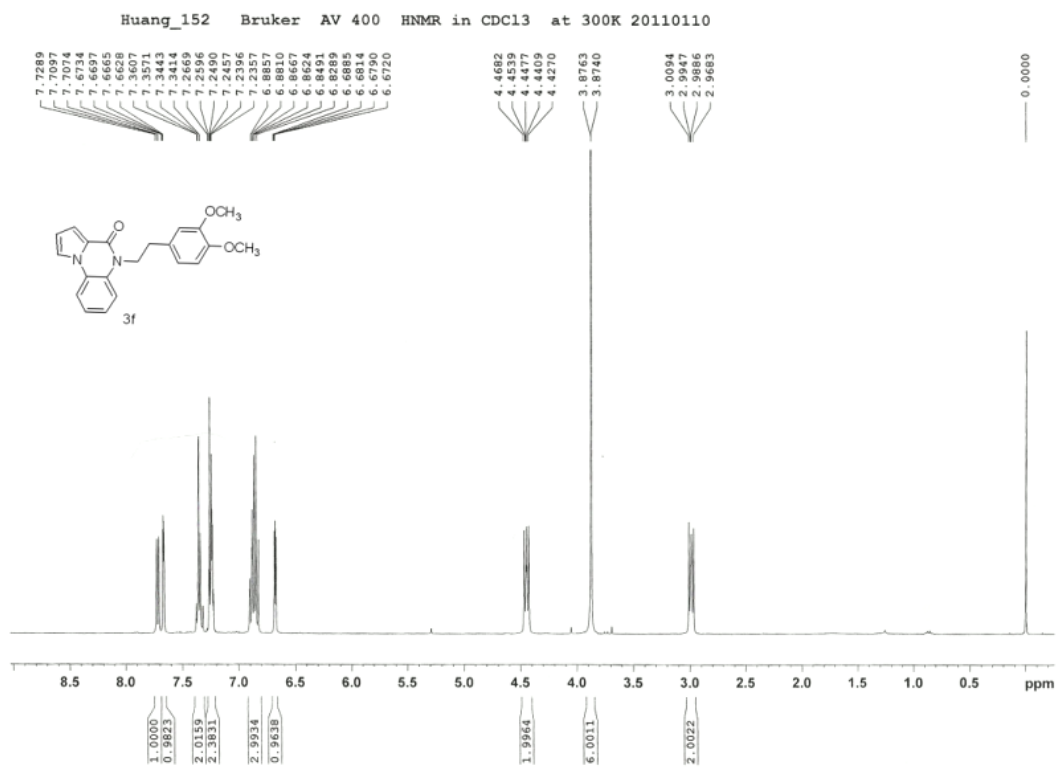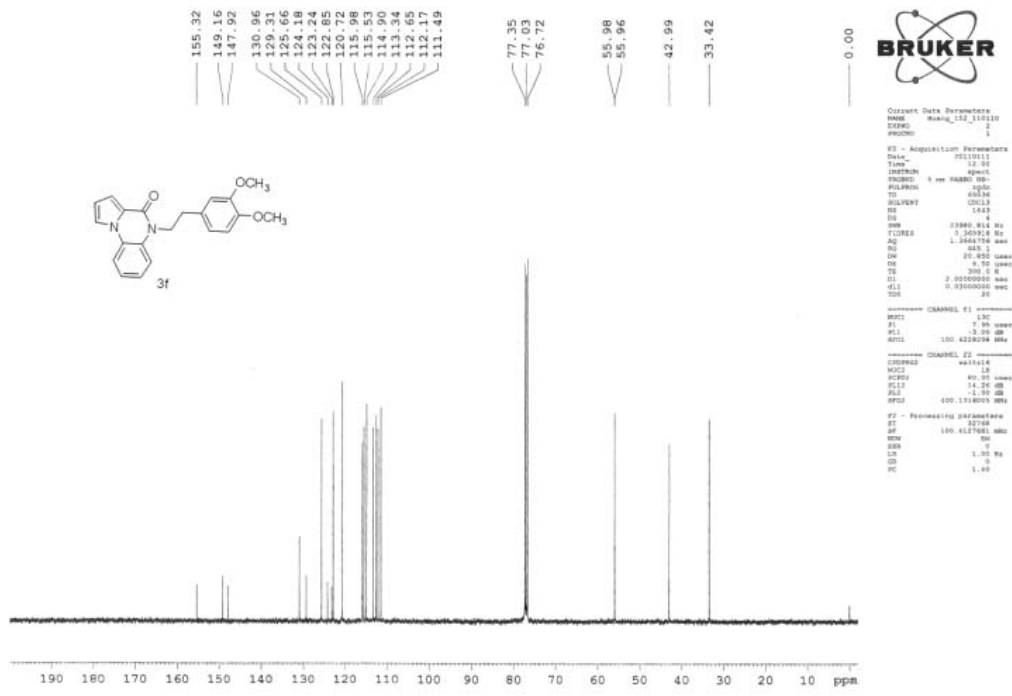

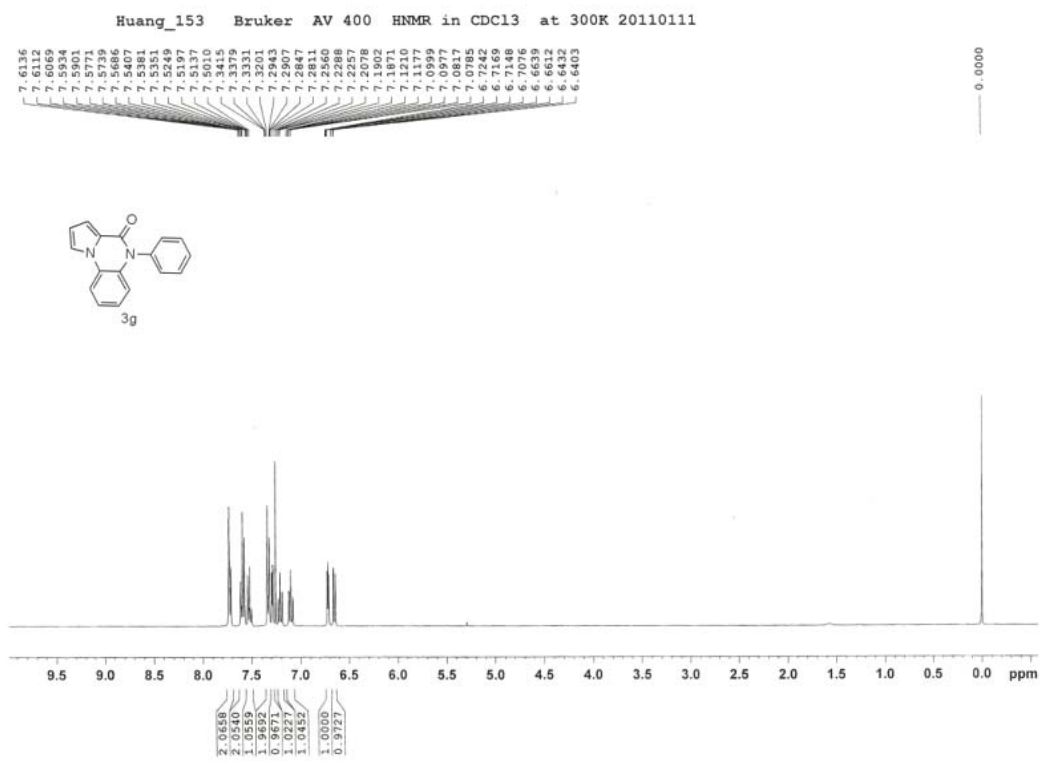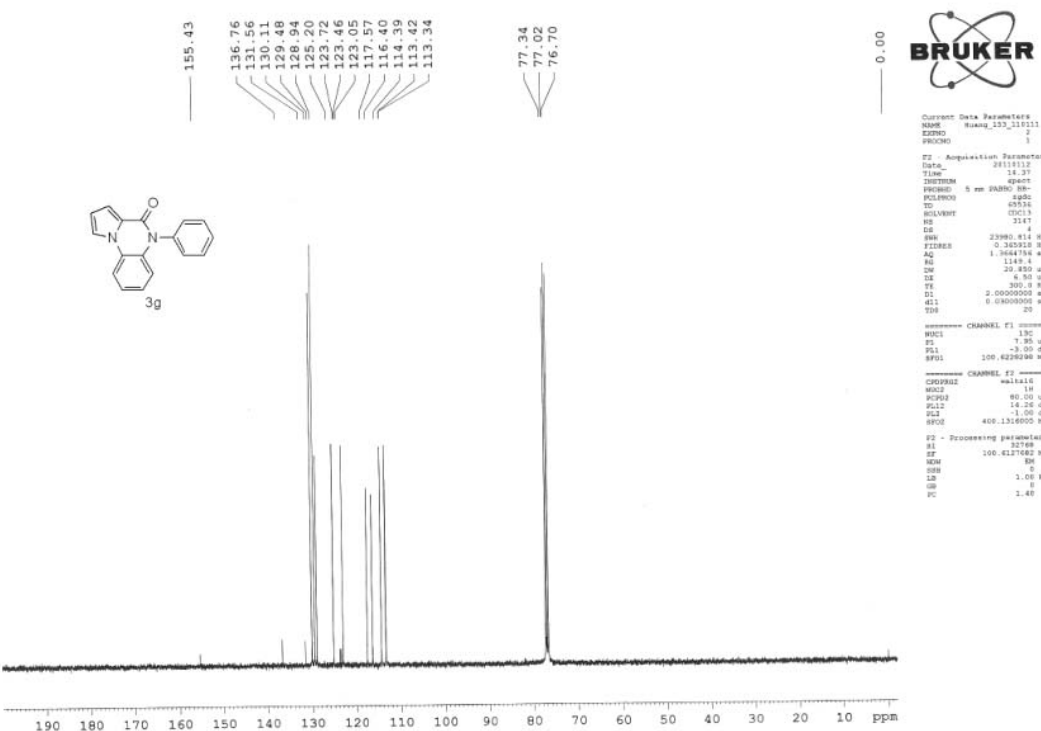





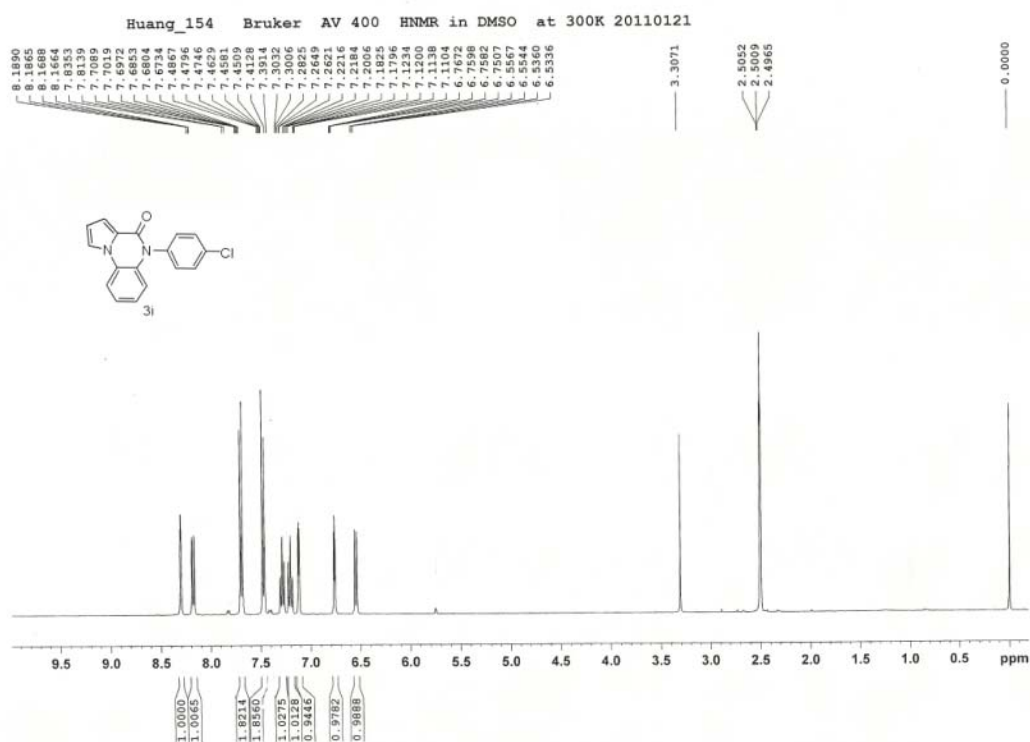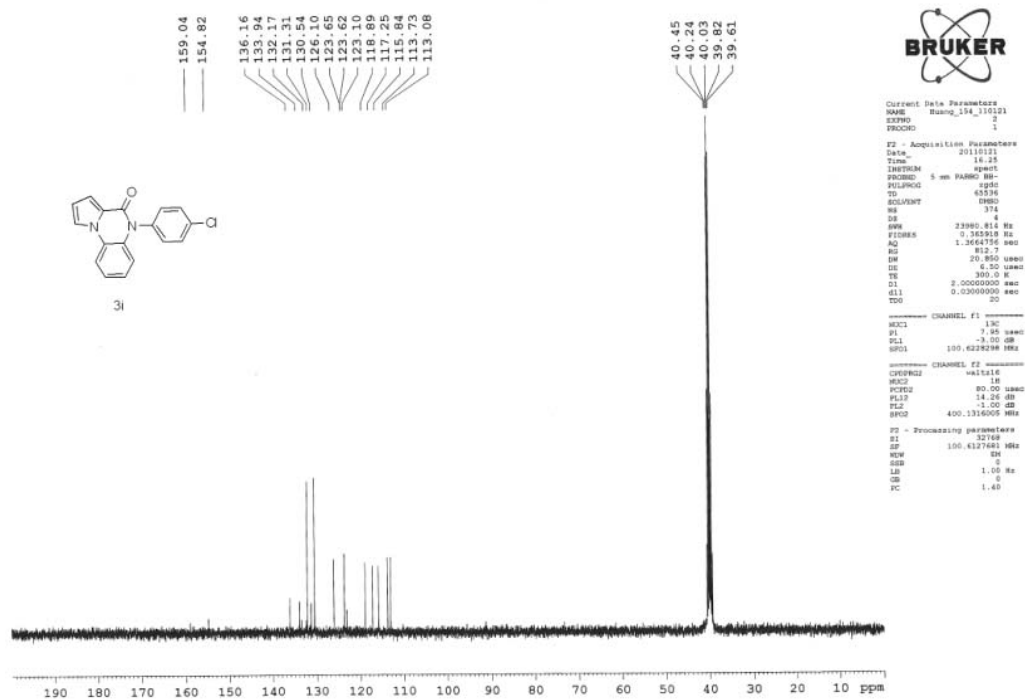

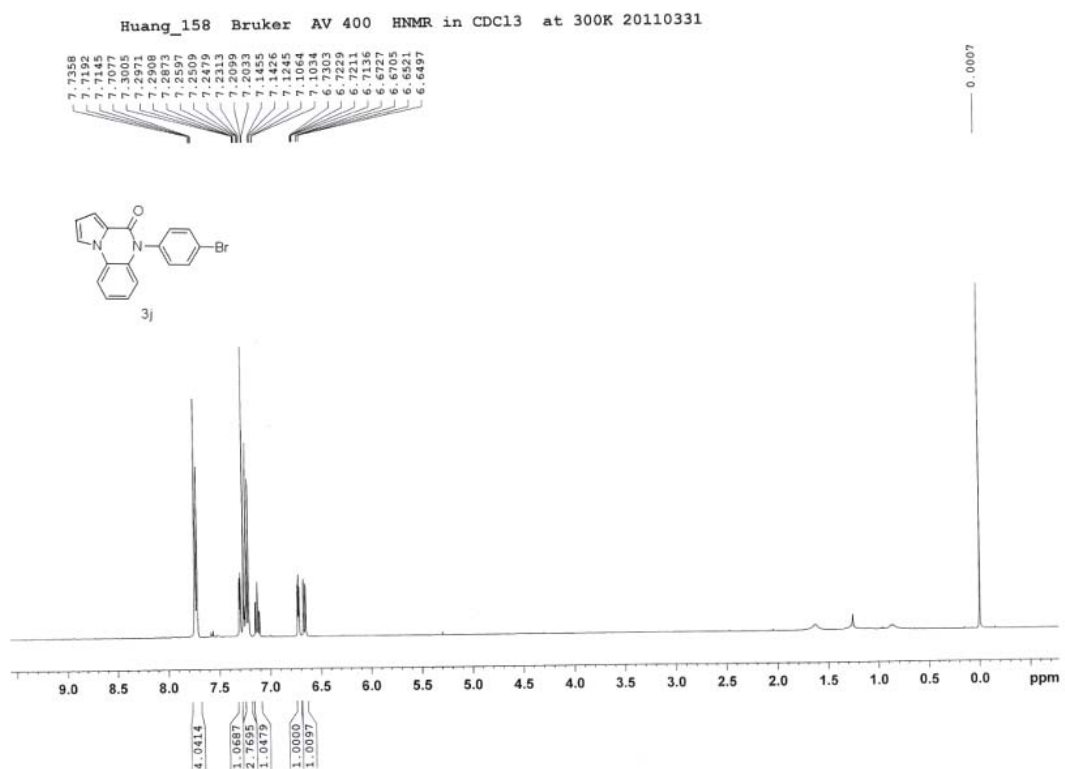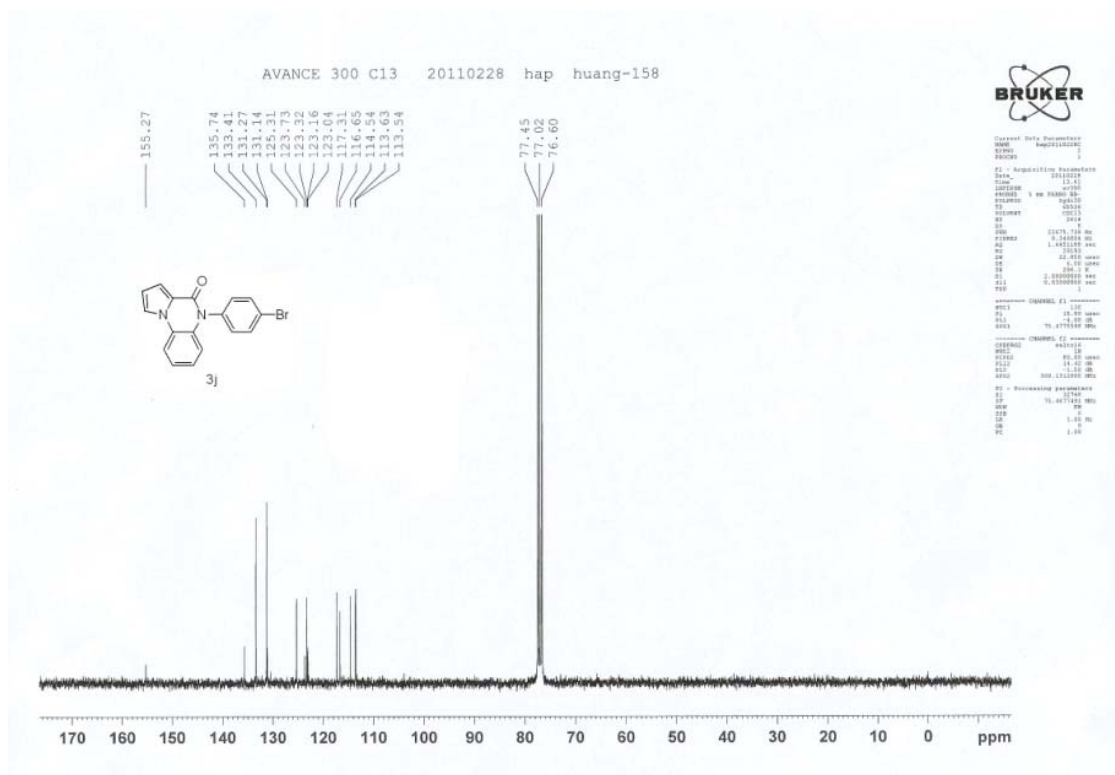

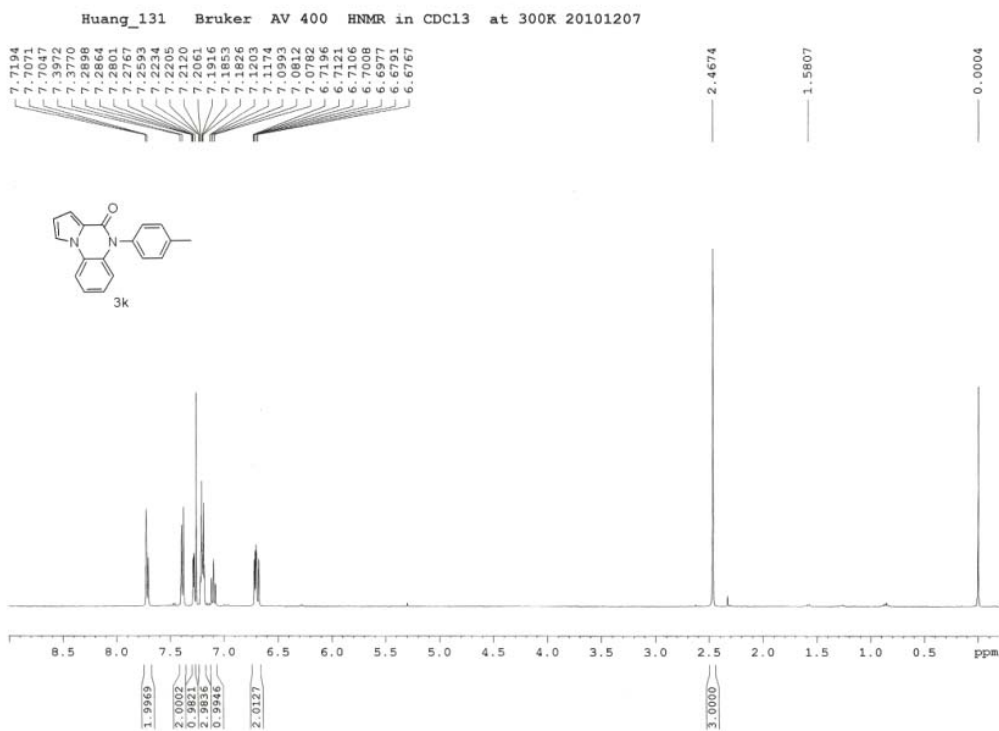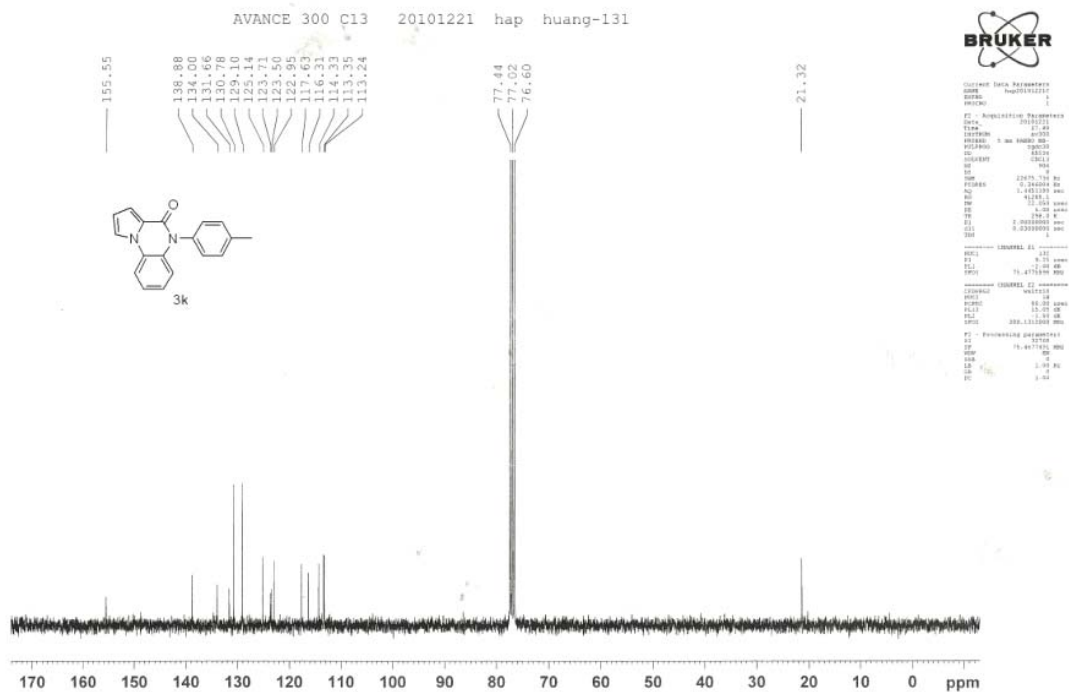

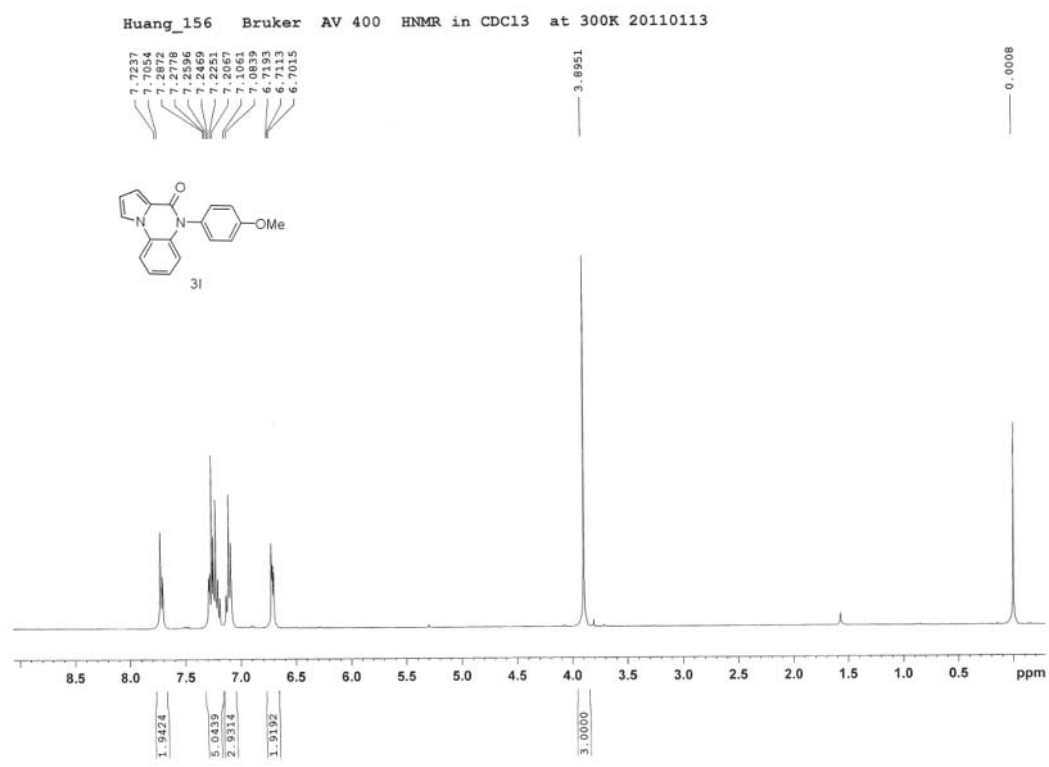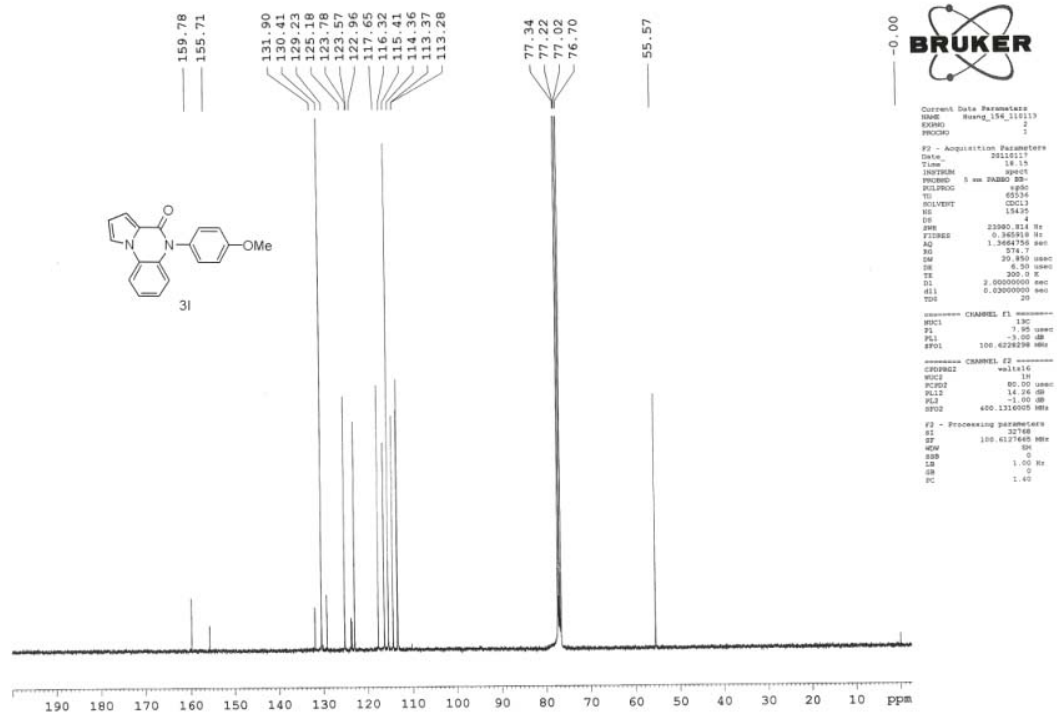



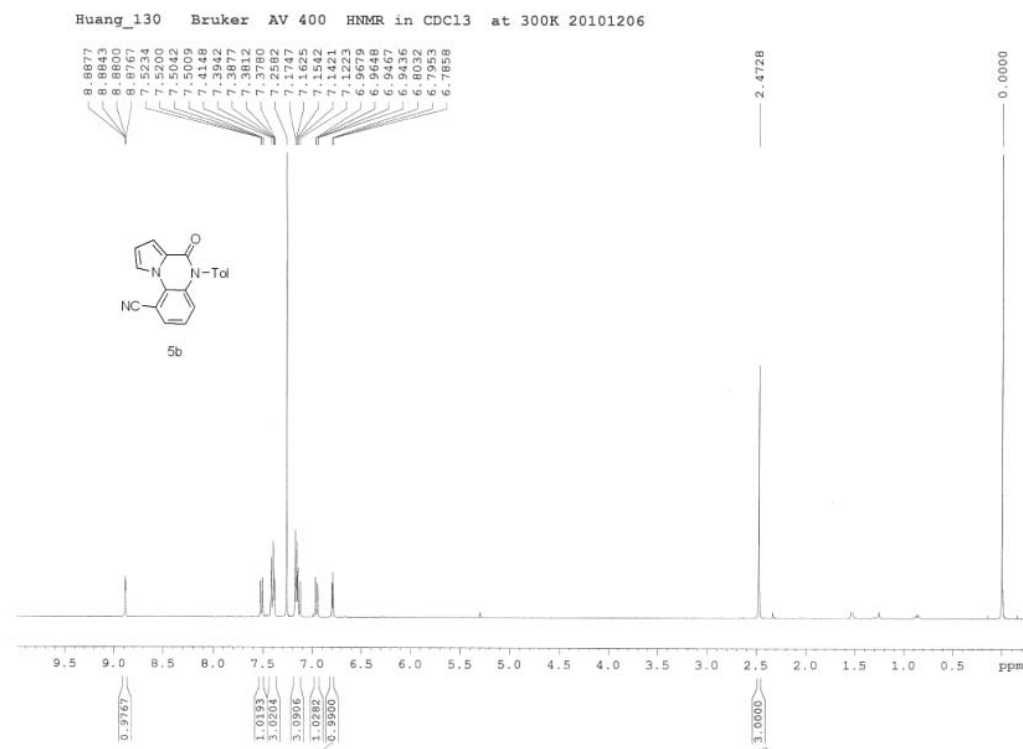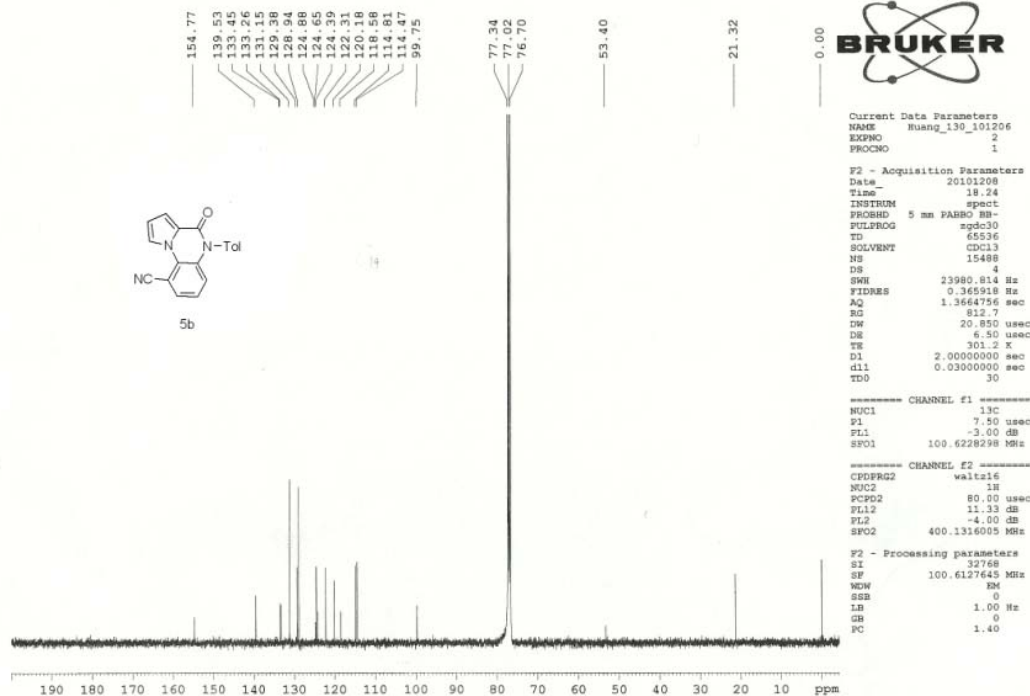

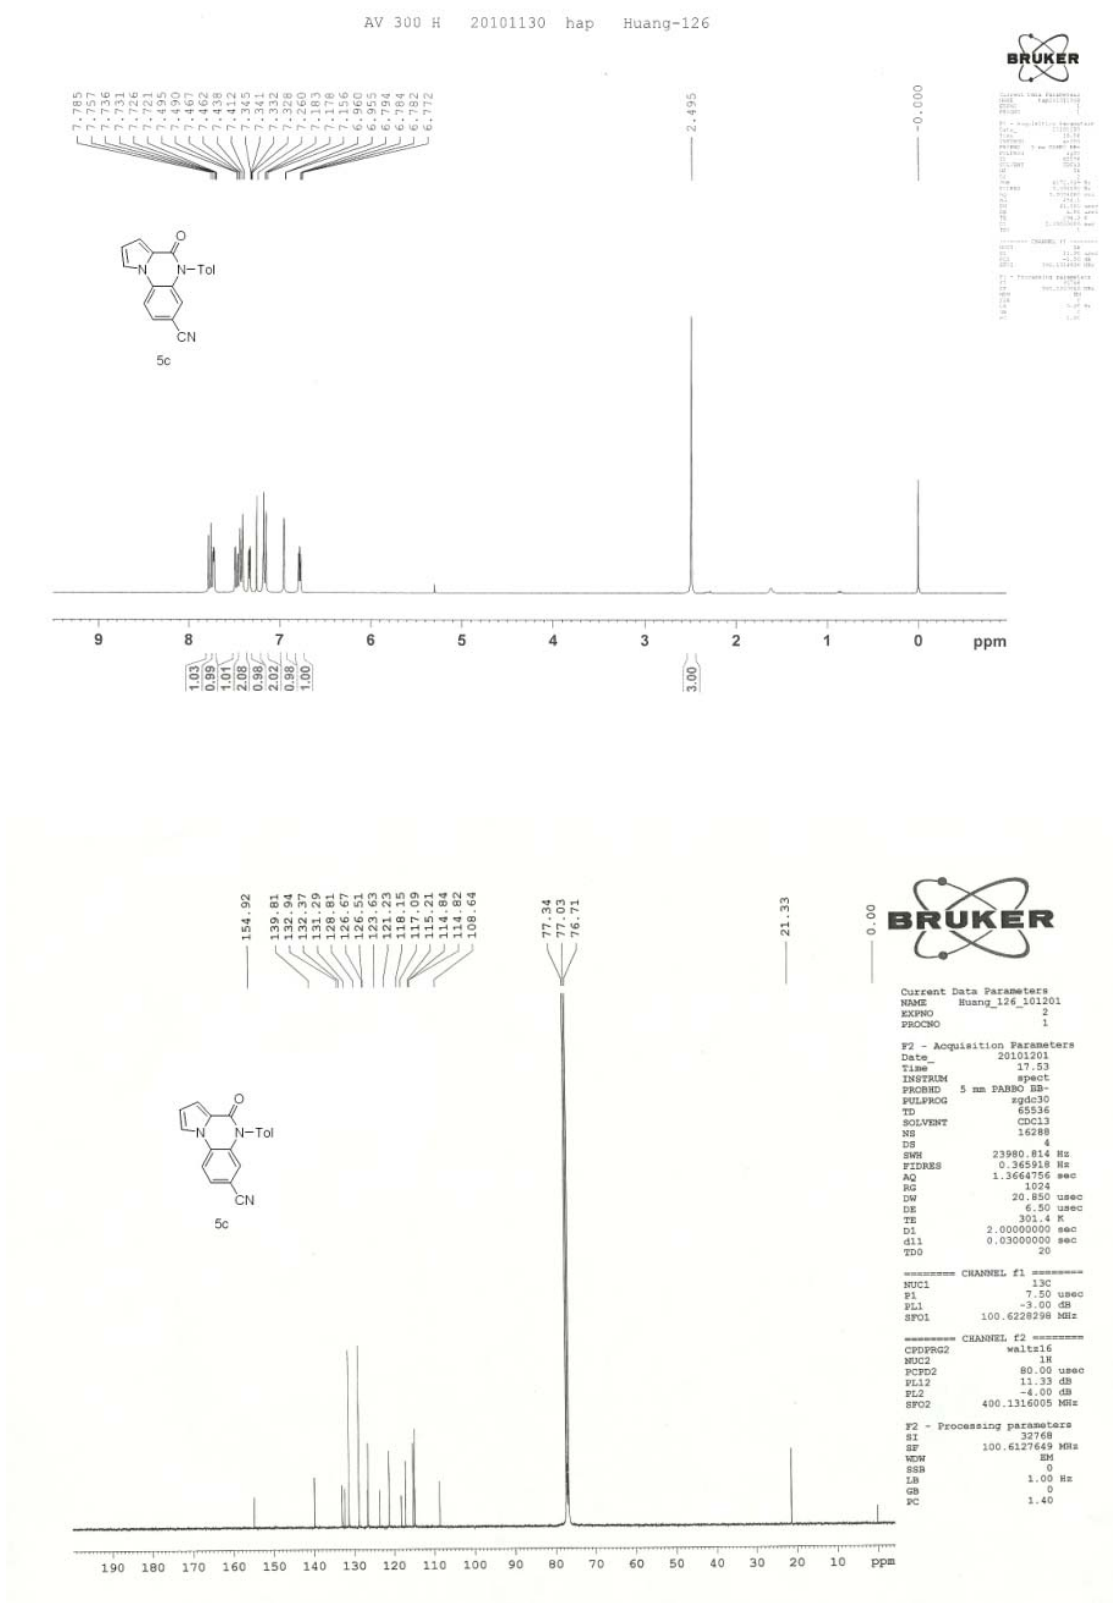



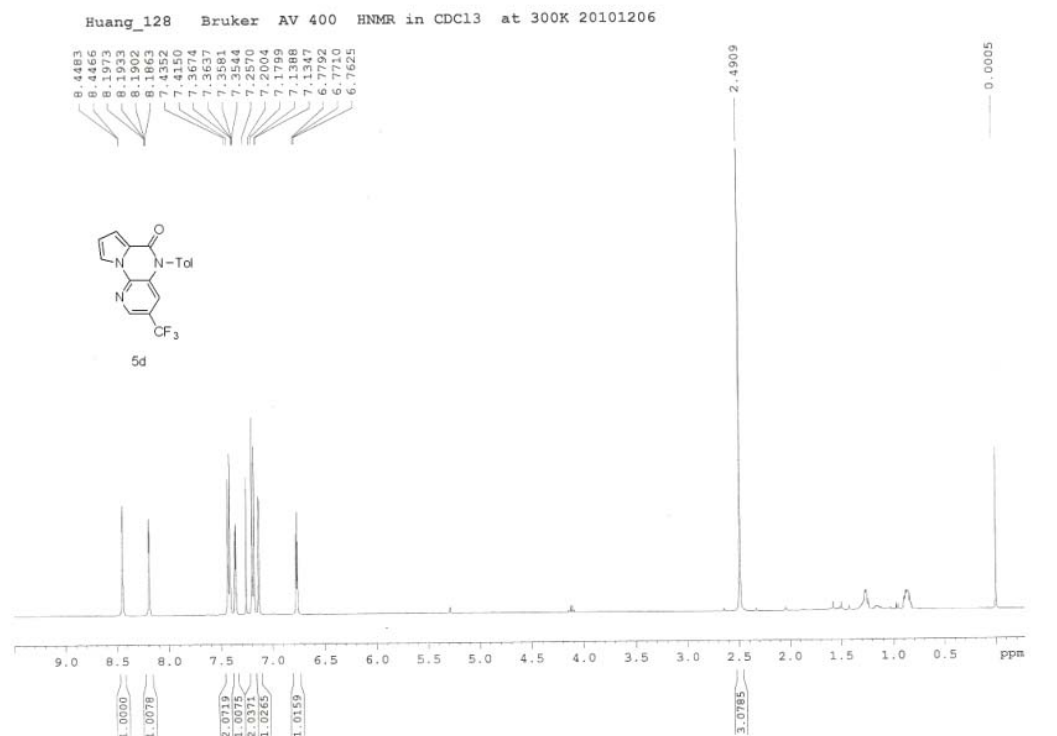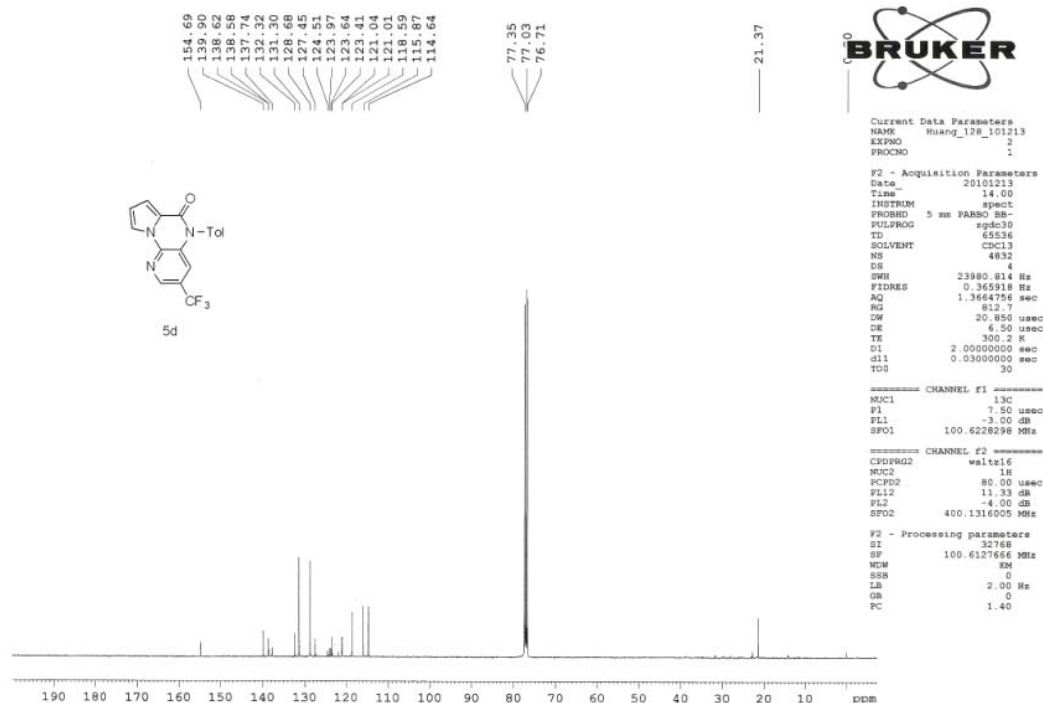

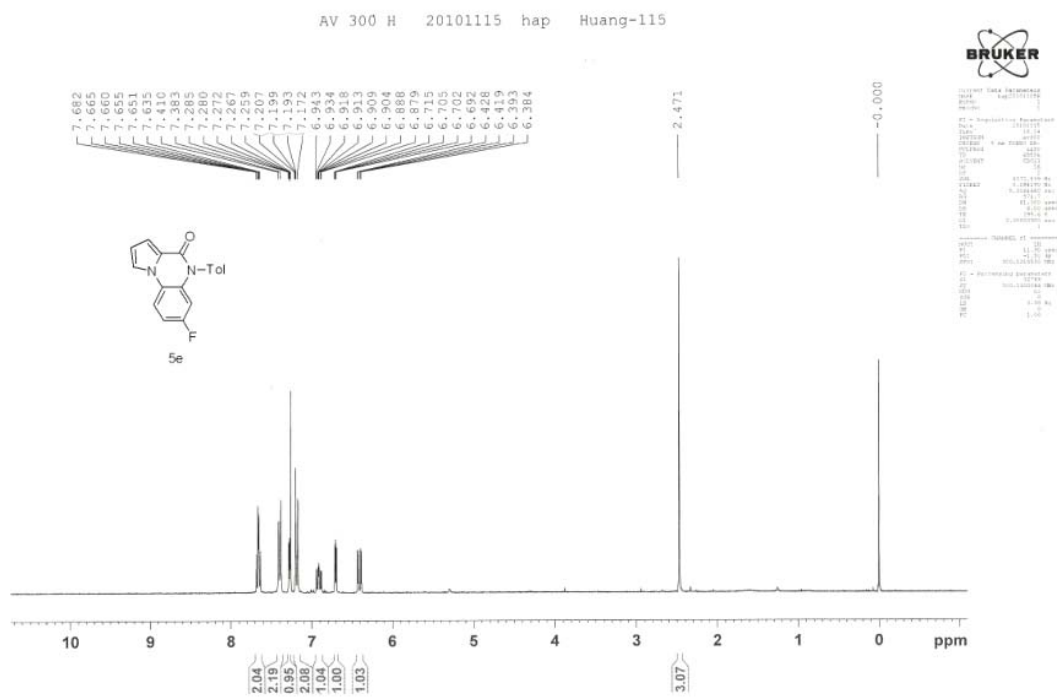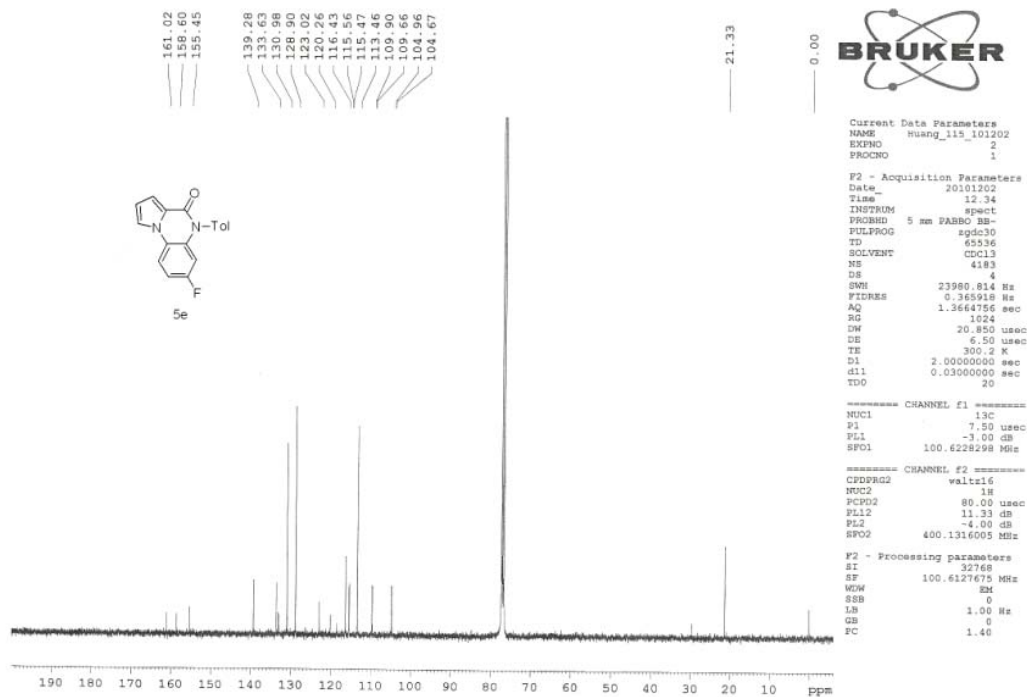

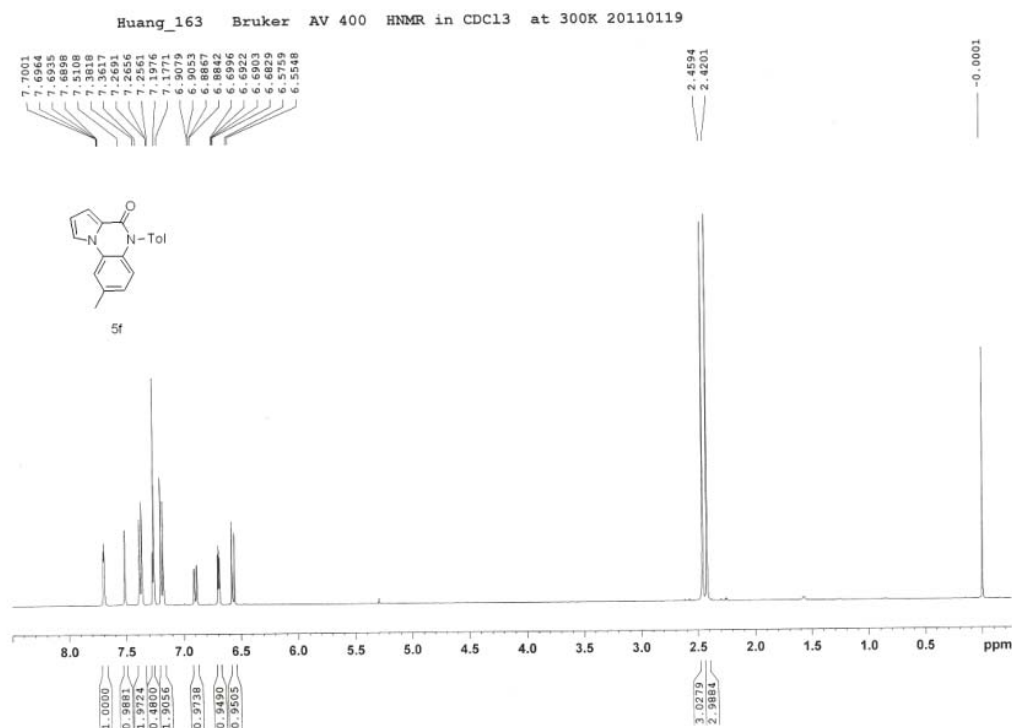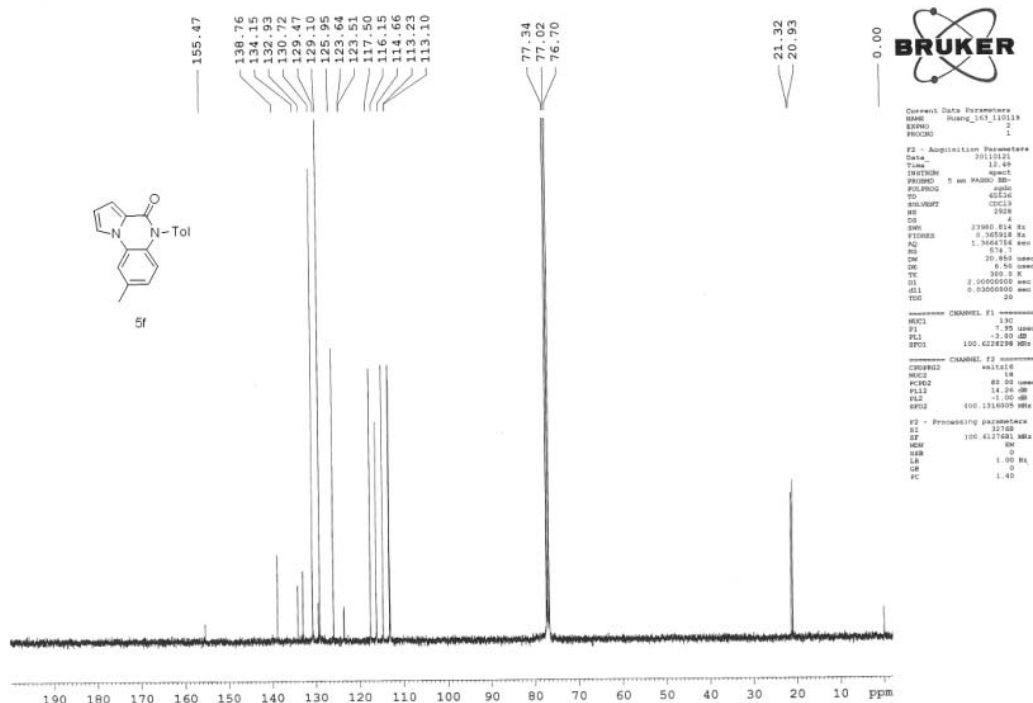

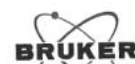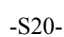

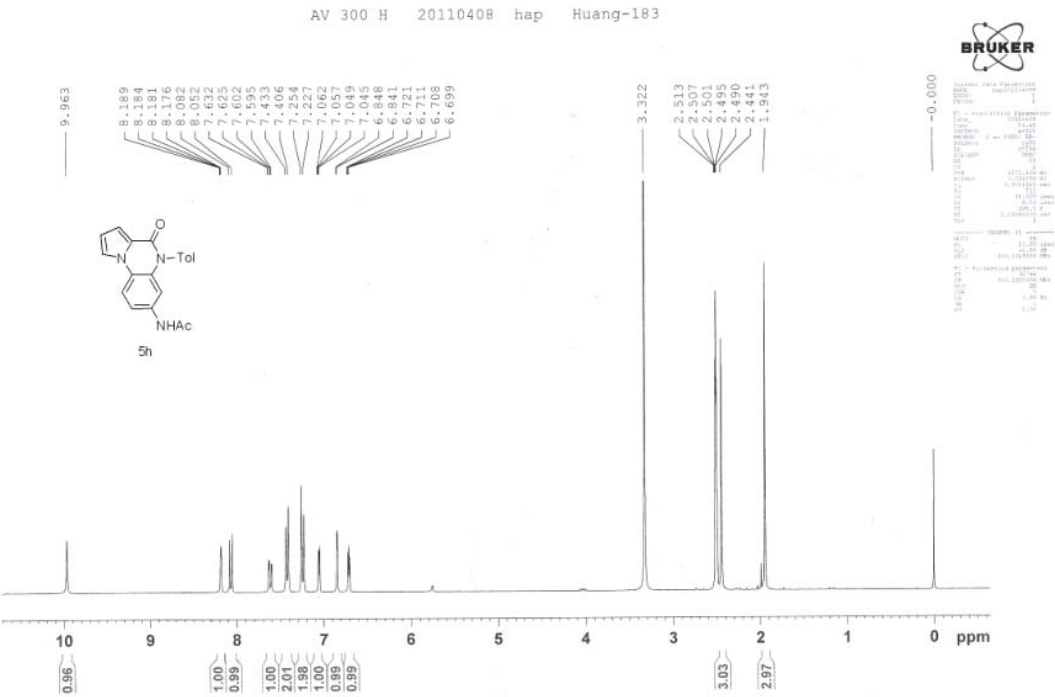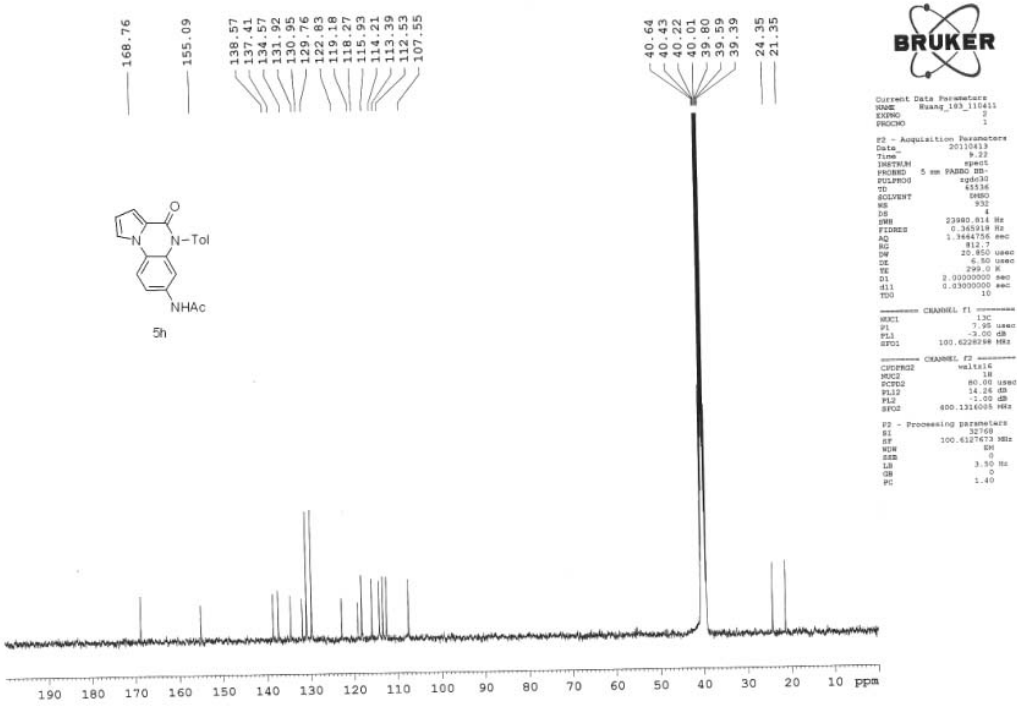

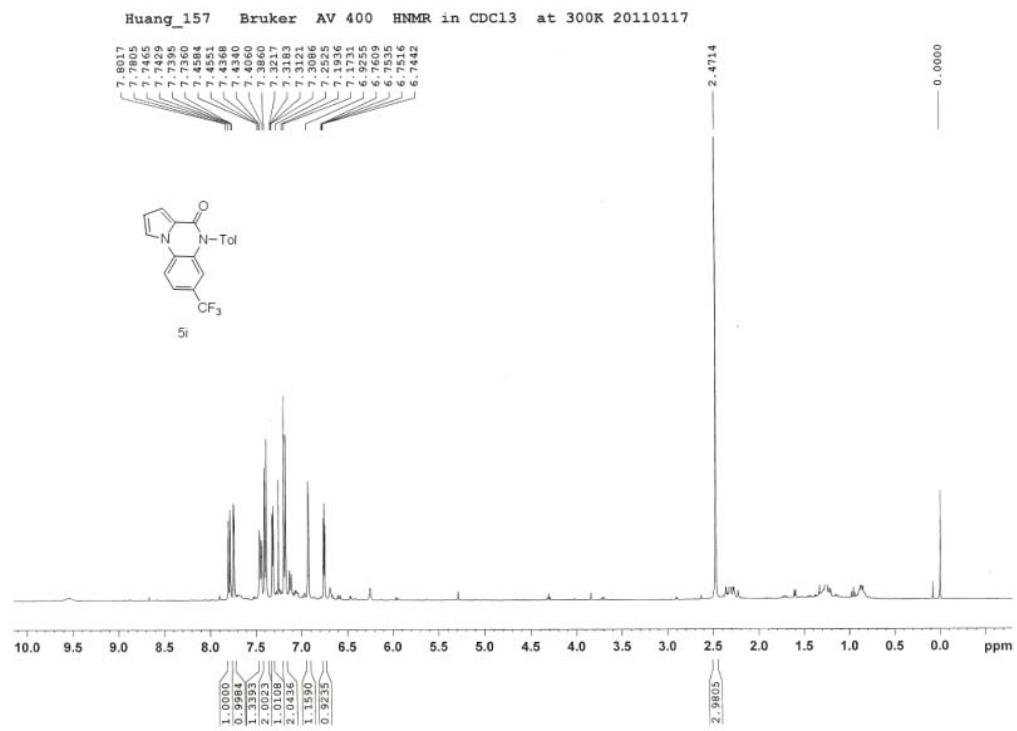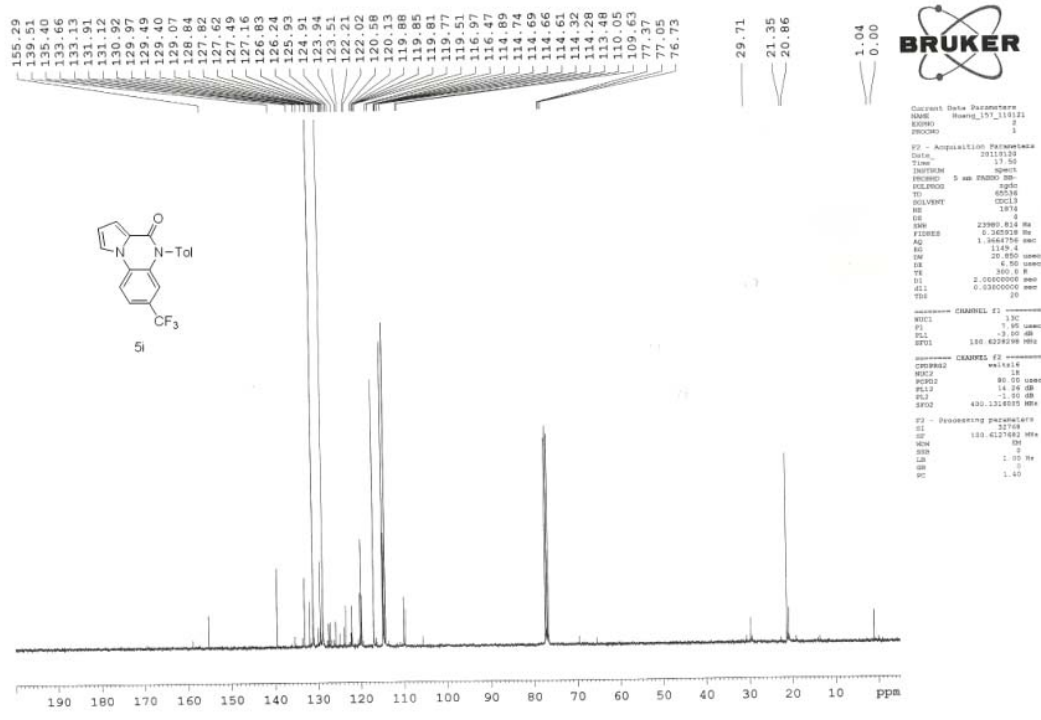

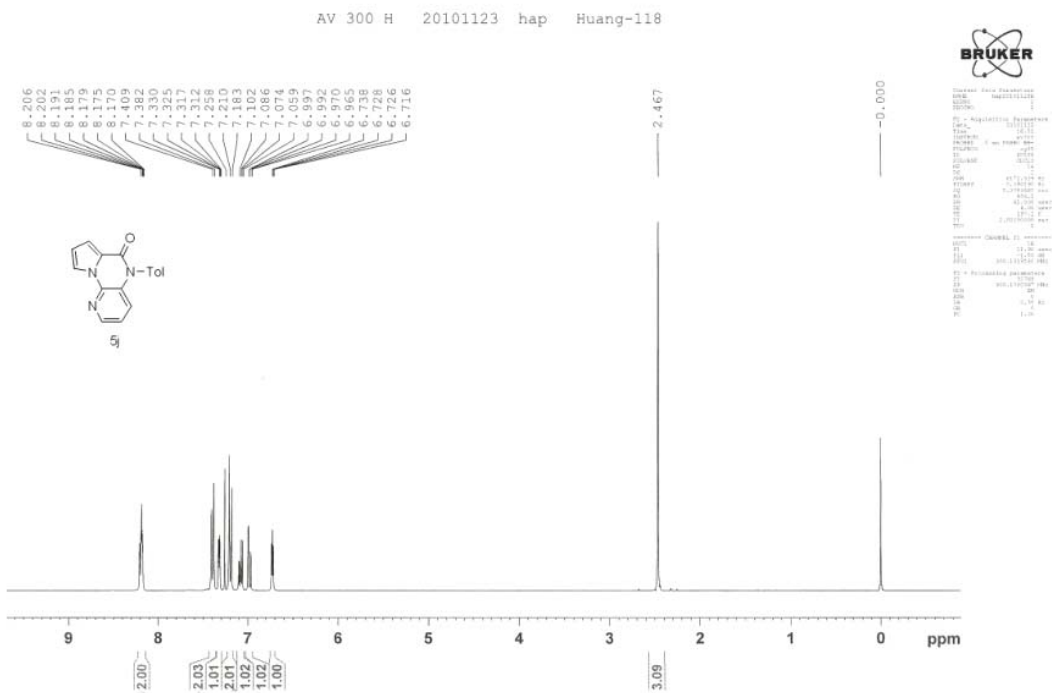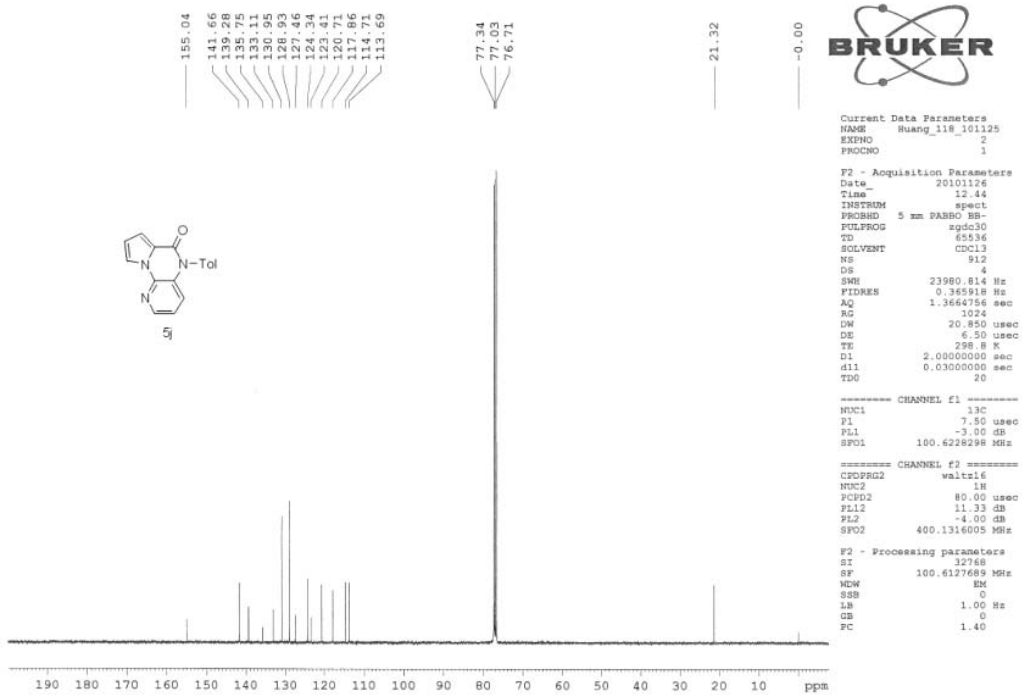

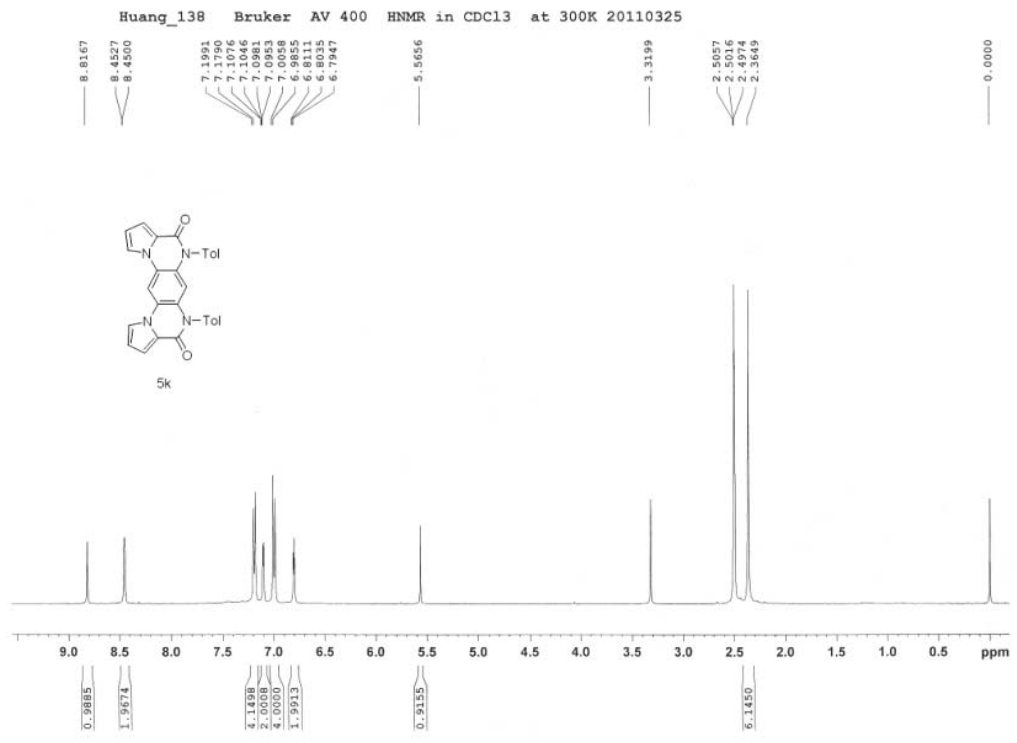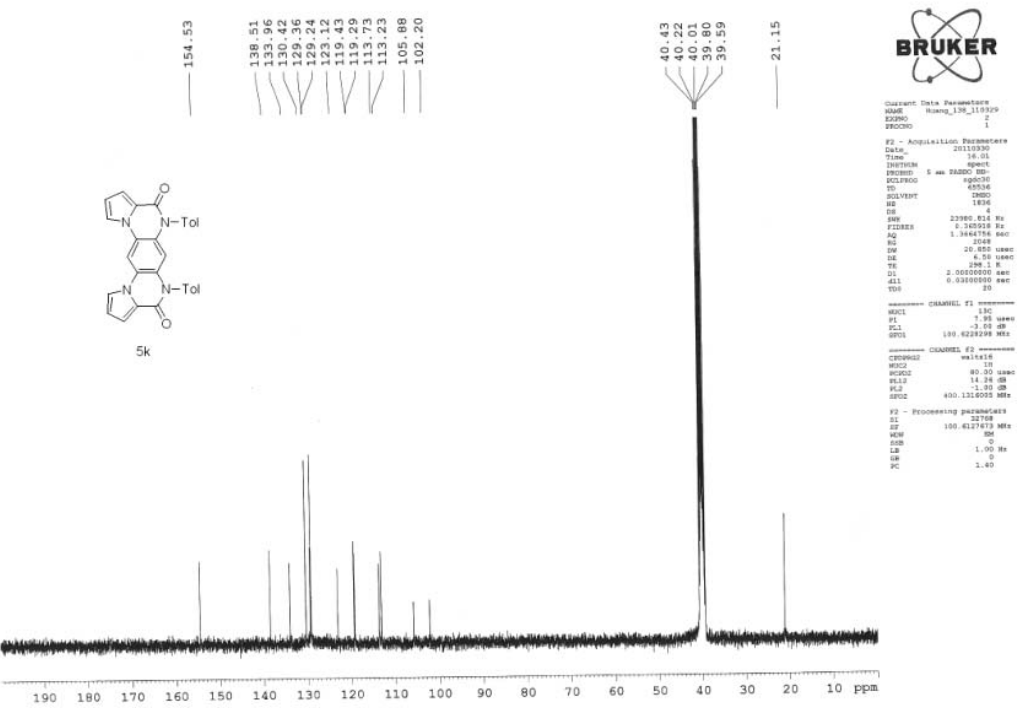



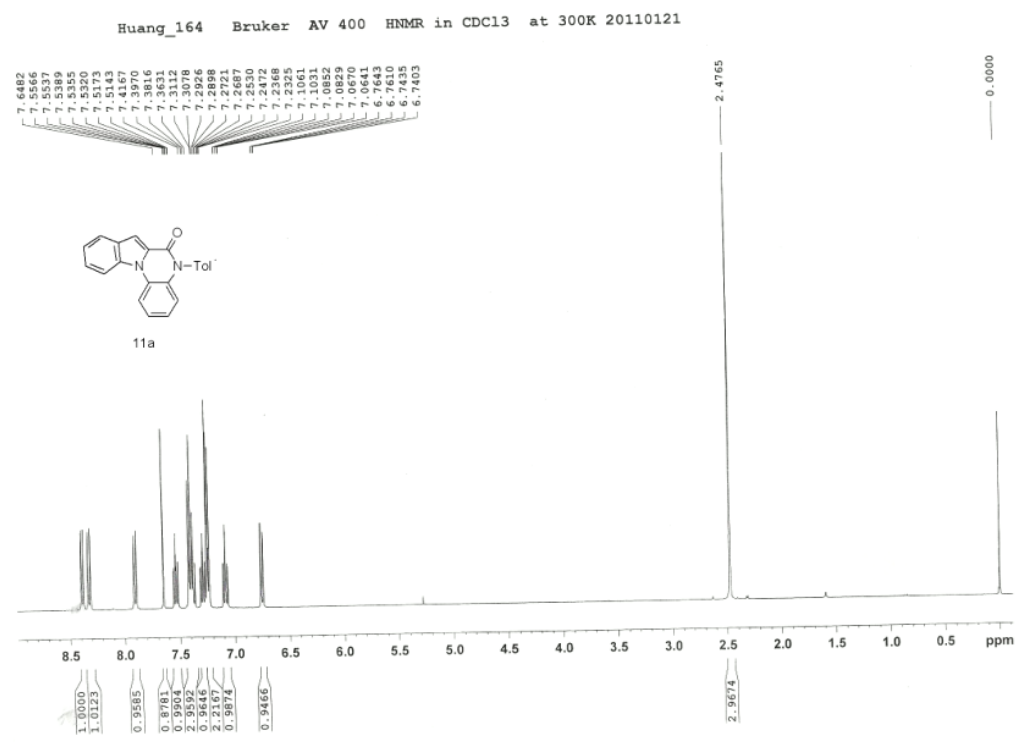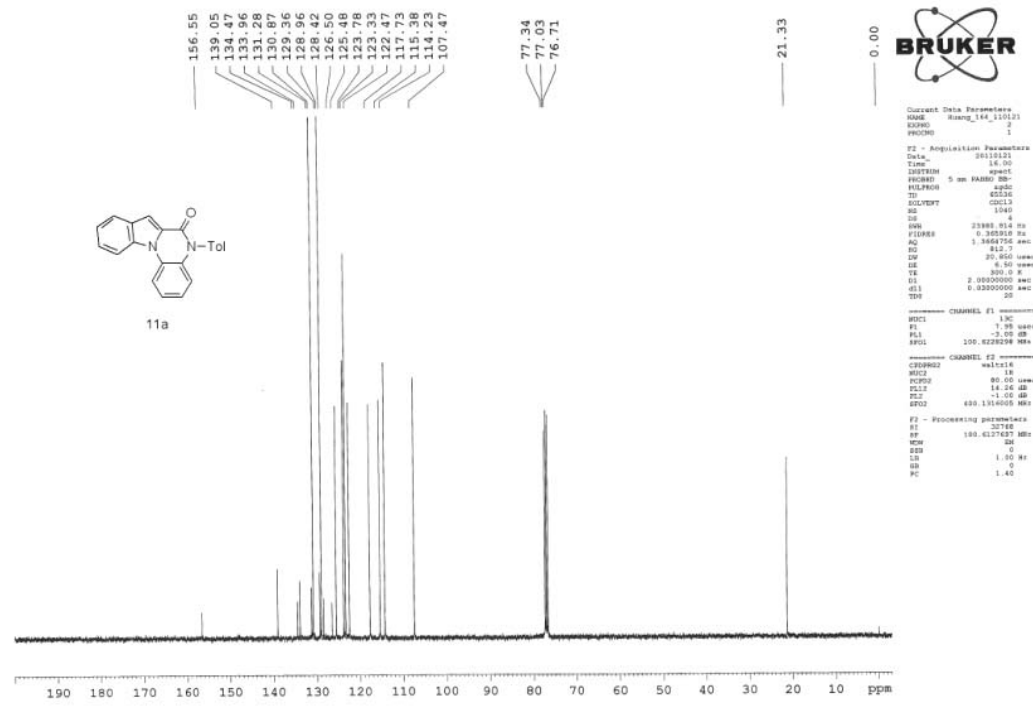

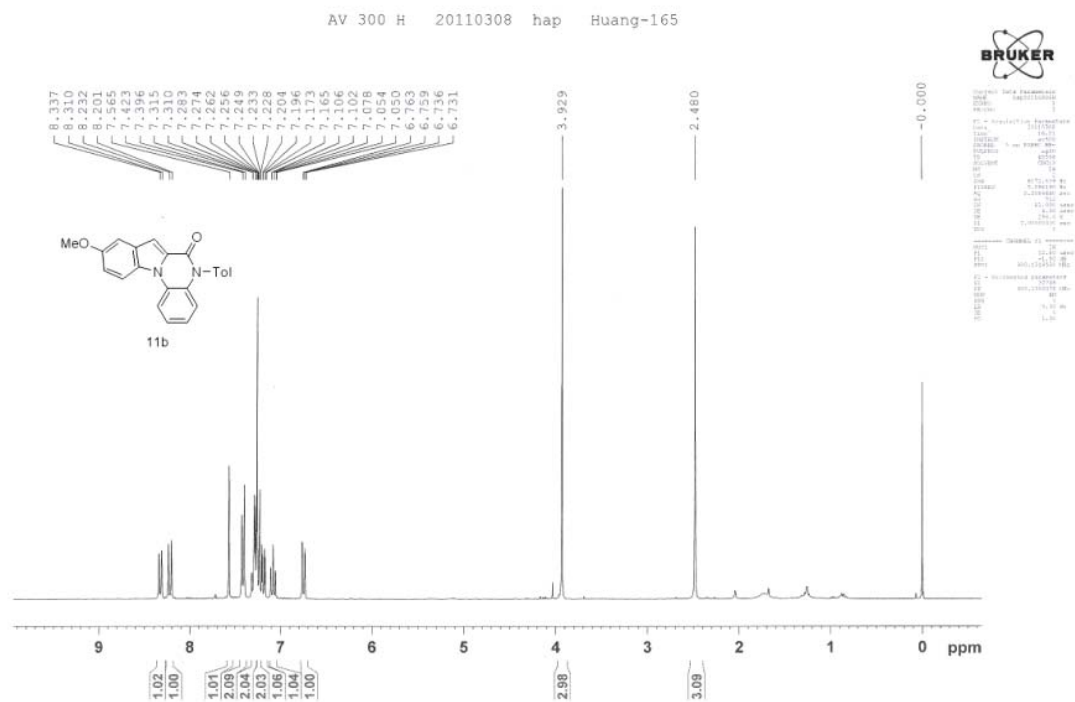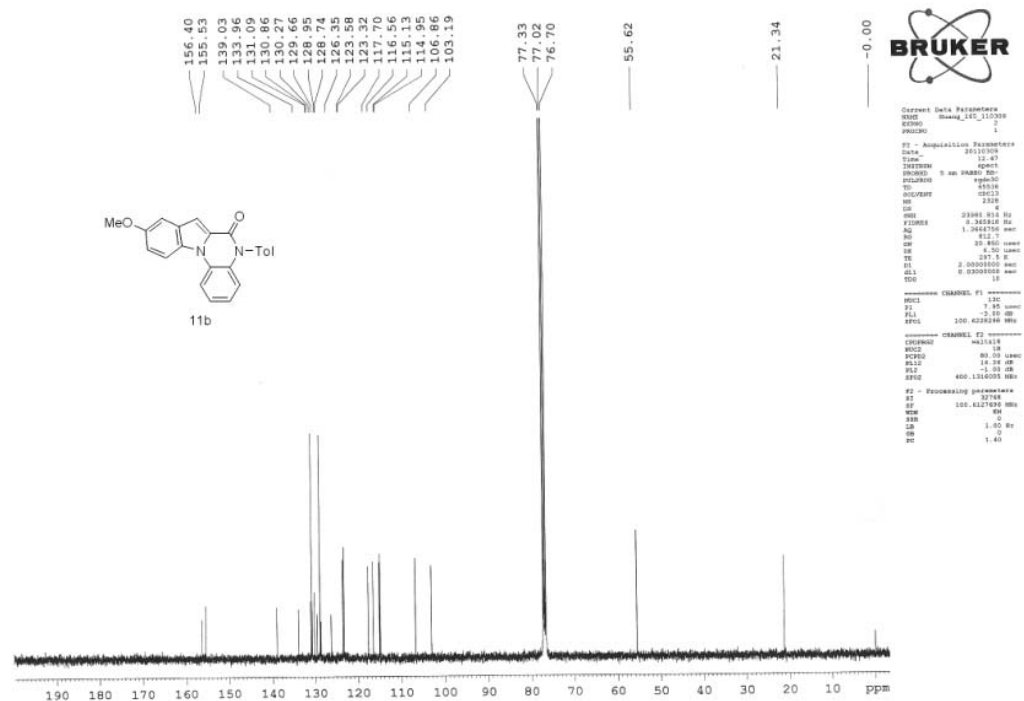

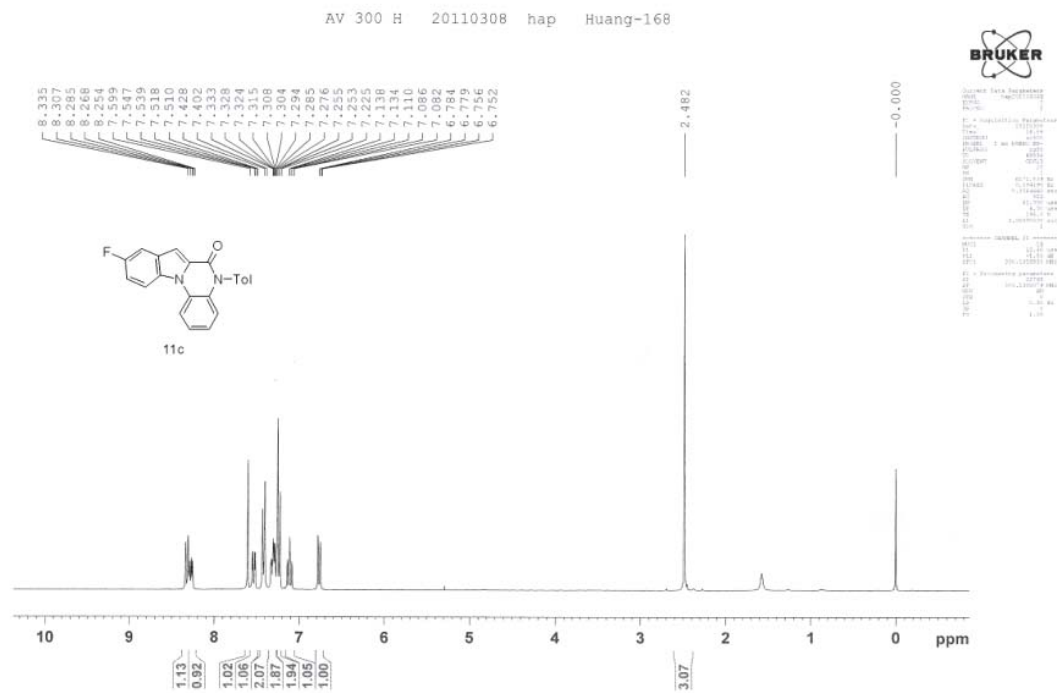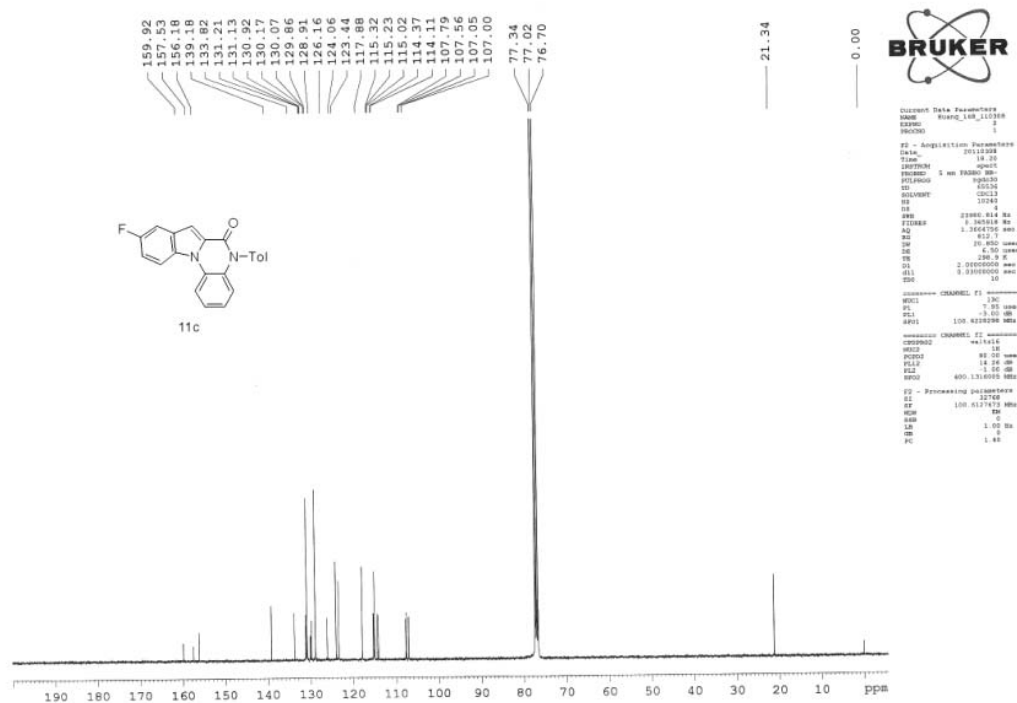

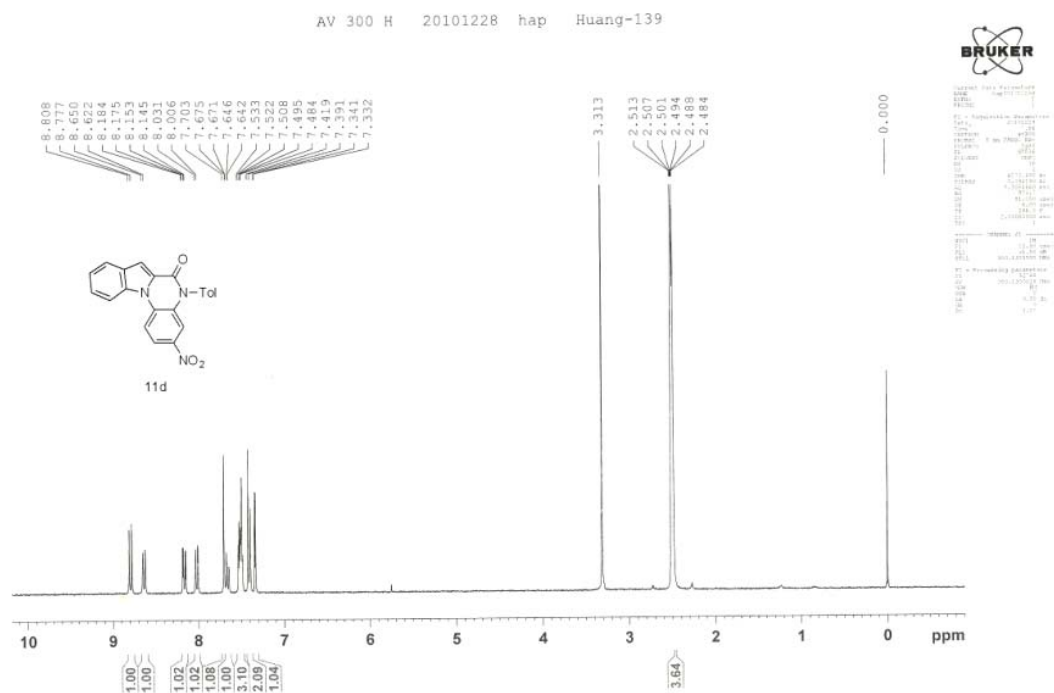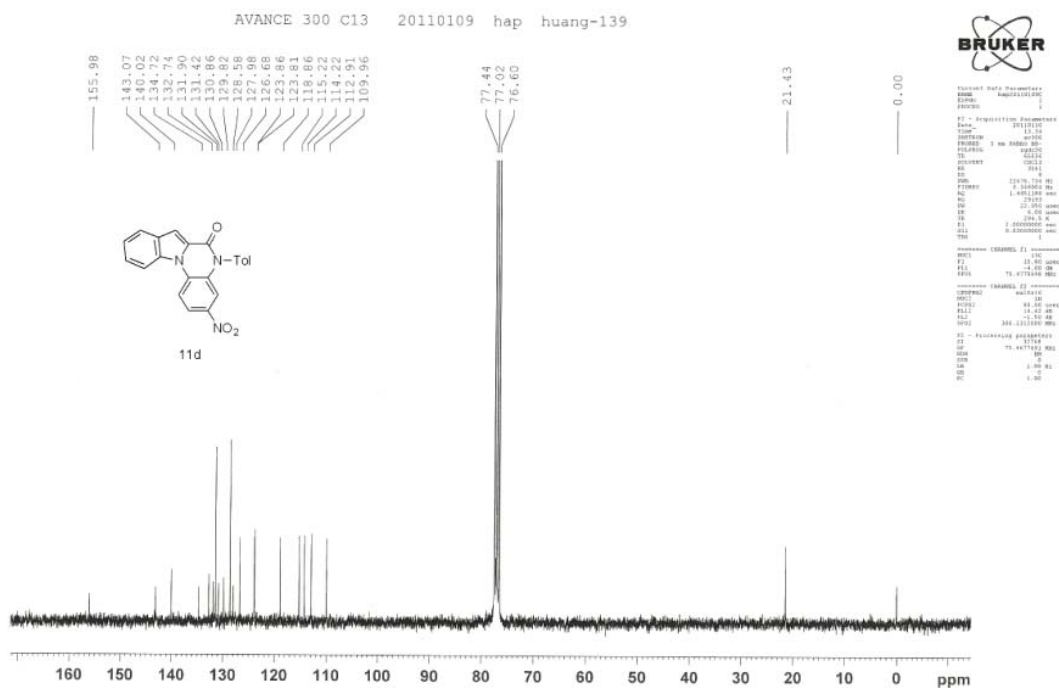

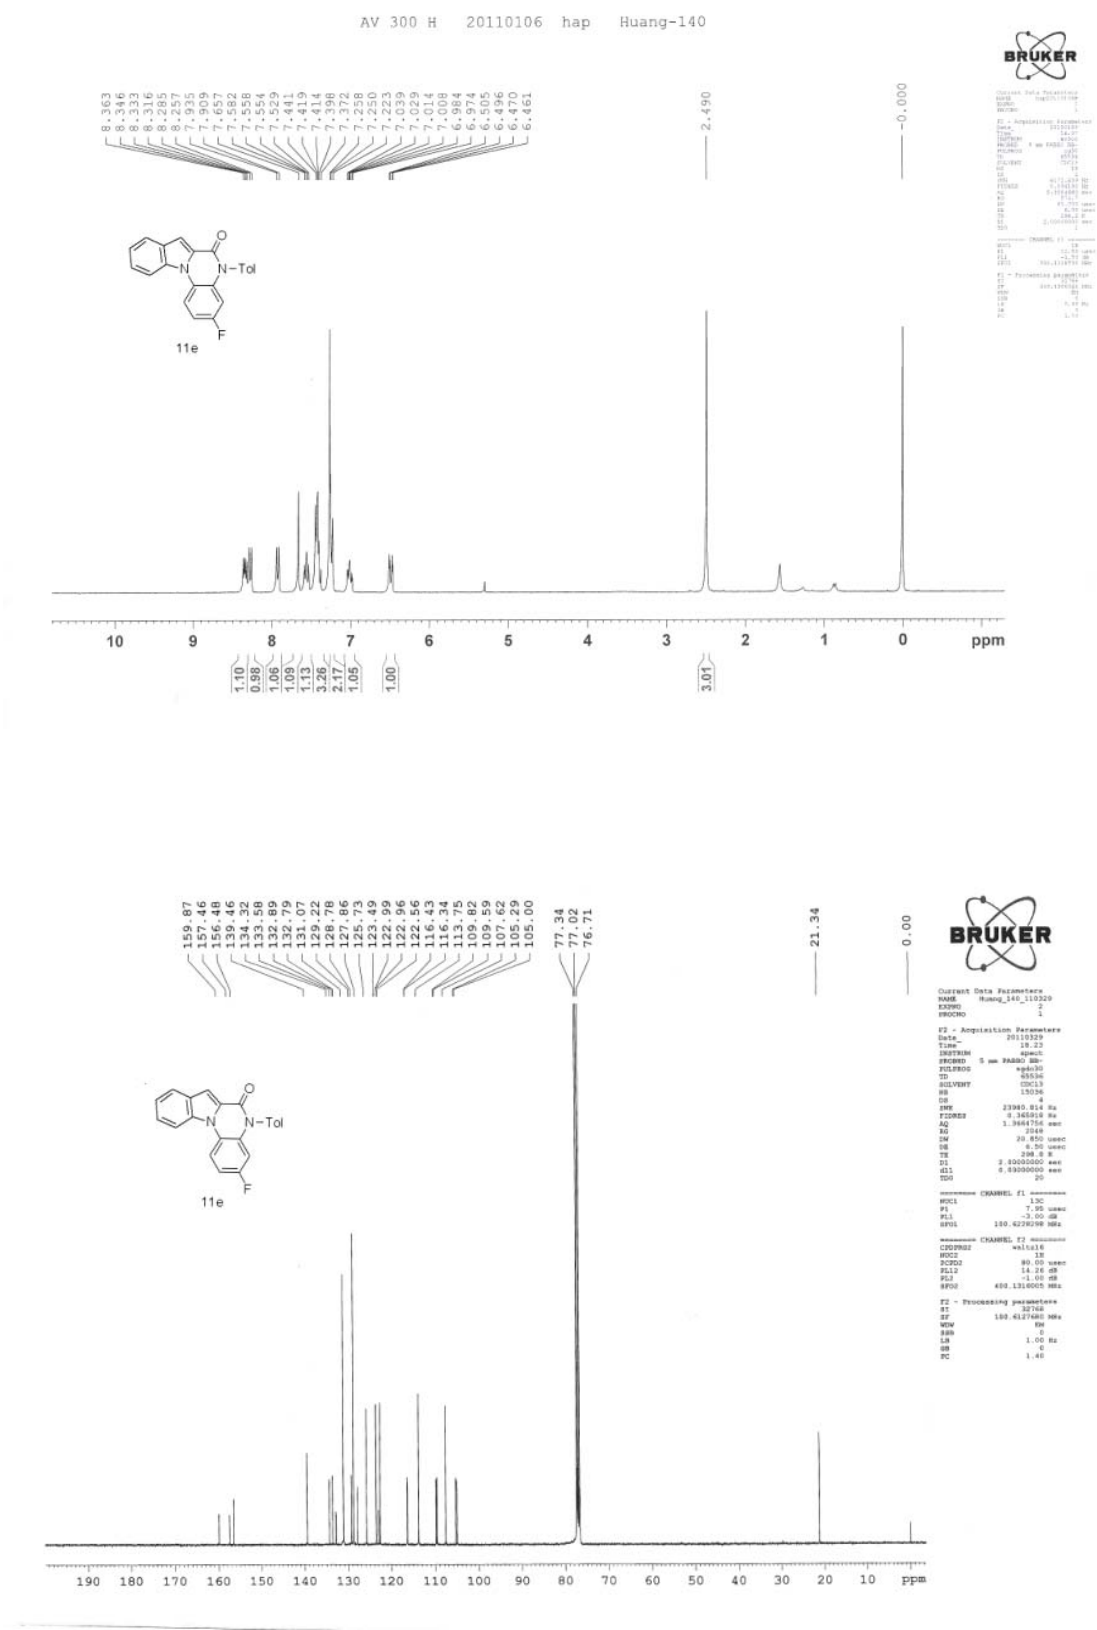

Supplement: c1ob05936j.pdf [file c1ob05936j.pdf]
